1  
2  
3  
4  
5  
6  
7  
8  
9  
10  
11  
12  
13  
14  
15  
16  
17  
18  
19  
20  
21  
22  
23  
24

**Rif1 inhibits replication fork progression and controls DNA copy number in *Drosophila*.**

Alexander Munden<sup>1</sup>, Zhan Rong<sup>1</sup>, Rama Gangula<sup>2</sup>, Simon Mallal<sup>2,3</sup> and Jared T. Nordman<sup>1,4</sup>

<sup>1</sup>Dept. of Biological Sciences, Vanderbilt University, Nashville, TN 37232

<sup>2</sup>Dept. of Medicine, <sup>3</sup>Dept. of Pathology, Microbiology and Immunology,  
Vanderbilt University School of Medicine, Nashville, TN 37232

Running title: Rif1 controls replication fork progression

Keywords: DNA replication, Common Fragile Sites, Replication Timing, *Drosophila*, genome stability

<sup>4</sup>Corresponding author: [jared.nordman@vanderbilt.edu](mailto:jared.nordman@vanderbilt.edu)

25 **ABSTRACT:**

26 Control of DNA copy number is essential to maintain genome stability and ensure proper cell  
27 and tissue function. In *Drosophila* polyploid cells, the SNF2-domain-containing SUUR protein  
28 inhibits replication fork progression within specific regions of the genome to promote DNA  
29 underreplication. While dissecting the function of SUUR's SNF2 domain, we identified a physical  
30 interaction between SUUR and Rif1. Rif1 has many roles in DNA metabolism and regulates the  
31 replication timing program. We demonstrate that repression of DNA replication is dependent  
32 on Rif1. Rif1 localizes to active replication forks in an SUUR-dependent manner and directly  
33 regulates replication fork progression. Importantly, SUUR associates with replication forks in  
34 the absence of Rif1, indicating that Rif1 acts downstream of SUUR to inhibit fork progression.  
35 Our findings uncover an unrecognized function of the Rif1 protein as a regulator of replication  
36 fork progression.

37

38

39

40

41

42

43

44

45

46

47 **INTRODUCTION:**

48 Accurate duplication of a cell's genetic information is essential to maintain genome stability.  
49 Proper regulation of DNA replication is necessary to prevent mutations and other chromosome  
50 aberrations that are associated with cancer and developmental abnormalities (Jackson et al.,  
51 2014). DNA replication begins at thousands of cis-acting sites termed origins of replication. The  
52 Origin Recognition Complex (ORC) binds to replication origins where, together with Cdt1 and  
53 Cdc6, it loads an inactive form of the MCM2-7 replicative helicase (Bell and Labib, 2016).  
54 Inactive helicases are phosphorylated by two key kinases, S-CDK and Dbf4-dependent kinase  
55 (DDK), which results in the activation of the helicase and recruitment of additional factors to  
56 form a pair of bi-directional replication forks emanating outward from the origin of replication  
57 (Siddiqui et al., 2013). Although many layers of regulation control the initiation of DNA  
58 replication, much less is known about how replication fork progression is regulated.

59  
60 In metazoans, replication origins are not sequence specific and are likely specified by a  
61 combination of epigenetic and structural features (Aggarwal and Calvi, 2004; Cayrou et al.,  
62 2011; Eaton et al., 2011; Mesner et al., 2011; Miotto et al., 2016; Remus et al., 2004).  
63 Furthermore, replication origins are not uniformly distributed throughout the genome. The  
64 result of non-uniform origin distribution is that, in origin-poor regions of the genome, a single  
65 replication fork must travel great distances to complete replication. If a replication fork  
66 encounters an impediment within a large origin-less region of the genome, then replication will  
67 be incomplete, resulting in genome instability (Newman et al., 2013). In fact, origin poor  
68 regions of the genome are known to be associated with chromosome fragility and genome

69 instability (Debatisse et al., 2012; Durkin and Glover, 2007; Letessier et al., 2011; Norio et al.,  
70 2005). This highlights the need to regulate both the initiation and elongation phases of DNA  
71 replication to maintain genome stability.

72

73 DNA replication is also regulated in a temporal manner where specific DNA sequences replicate  
74 at precise times during S phase, a process known as the DNA replication timing program. While  
75 euchromatin replicates in the early part of S phase, heterochromatin and other repressive  
76 chromatin types replicate in the later portion of S phase (Gilbert, 2002; Rhind and Gilbert,  
77 2013). Although the process of replication timing has been appreciated for many years, the  
78 underlying molecular mechanisms controlling timing have remained elusive. The discovery of  
79 factors that regulate the DNA replication timing program, however, demonstrate that  
80 replication timing is an actively regulated process.

81

82 Once factor that regulates replication timing from yeast to humans is Rif1 (Rap1-interacting  
83 factor 1). Rif1 was initially identified as a regulator of telomere length in budding yeast (Hardy  
84 et al., 1992), but this function of Rif1 appears to be specific to yeast (Xu, 2004). Subsequently,  
85 Rif1 has been shown to regulate multiple aspects of DNA replication and repair. In mammalian  
86 cells, Rif1 has been shown to regulate DNA repair pathway choice by preventing resection of  
87 double-strand breaks and favoring non-homologous end joining (NHEJ) over homologous  
88 recombination (Chapman et al., 2013; Di Virgilio et al., 2013; Zimmermann et al., 2013). Rif1  
89 from multiple organisms contains a Protein Phosphatase 1 (PP1) interaction motif and Rif1 is

90 able to recruit PP1 to DDK-activated helicases to inactive them and prevent initiation of  
91 replication (Davé et al., 2014; Hiraga et al., 2014; 2017).

92

93 In yeasts, flies and mammalian cells, Rif1 has been shown to regulate the replication timing  
94 program (Cornacchia et al., 2012; Hayano et al., 2012; Peace et al., 2014; Sreesankar et al.,  
95 2015; Yamazaki et al., 2012). The precise mechanism(s) through which Rif1 functions to control  
96 replication timing are not fully understood. For example, Rif1 has been show to interact with  
97 Lamin and is thought to tether specific regions of the genome to the nuclear periphery (Foti et  
98 al., 2015). How this activity is related to Rif1's ability to inactivate helicases together with PP1 in  
99 controlling the timing program remains obscure.

100

101 Studying DNA replication in the context of development provides a powerful method to  
102 understand how DNA replication is regulated both spatially and temporally. Although DNA  
103 replication is a highly ordered process, it must be flexible enough to accommodate the changes  
104 in S phase length and cell cycle parameters that occur as cells differentiate (Matson et al.,  
105 2017). For example, during *Drosophila* development the length of S phase can vary from ~8  
106 hours in a differentiated mitotic cell to 3-4 minutes during early embryonic cell cycles  
107 (Blumenthal et al., 1974; Spradling and Orr-Weaver, 1987). Additionally, many tissues and cell  
108 types in *Drosophila* are polyploid, having multiple copies of the genome in a single cell (Edgar  
109 and Orr-Weaver, 2001; Lilly and Duronio, 2005; Zielke et al., 2013).

110

111 In polyploid cells, copy number is not always uniform throughout the genome (Rudkin, 1969;  
112 Hua and Orr-Weaver, 2017; Spradling and Orr-Weaver, 1987). Both heterochromatin and  
113 several euchromatic regions of the genome have reduced DNA copy number relative to overall  
114 ploidy (Nordman et al., 2011). Underreplicated euchromatic regions of the genome share key  
115 features with common fragile sites in that they are devoid of replication origins, late replicating,  
116 display DNA damage and are tissue-specific (Andreyeva et al., 2008; Nordman et al., 2014; Sher  
117 et al., 2012; Yarosh and Spradling, 2014). The presence of underreplication is conserved in  
118 mammalian cells, but the mechanism(s) mammalian cells use to promote underreplication is  
119 unknown (Hannibal et al., 2014). In *Drosophila*, underreplication is an active process that is  
120 largely dependent on the Suppressor of Underreplication protein, SUUR (Makunin et al., 2002;  
121 Nordman and Orr-Weaver, 2015).

122  
123 Understanding how the SUUR protein functions will significantly increase our understanding of  
124 the developmental control of DNA replication. The SUUR protein has a recognizable SNF2-like  
125 chromatin remodeling domain at its N-terminus, but based on sequence analysis, this domain is  
126 predicted to be defective for ATP binding and hydrolysis (Makunin et al., 2002; Nordman and  
127 Orr-Weaver, 2015). Outside of the SNF2 domain, SUUR has no recognizable motifs or domains,  
128 which has hampered a mechanistic understanding of how SUUR promotes underreplication.  
129 Recently, however, SUUR was shown to control copy number by directly reducing replication  
130 fork progression (Nordman et al., 2014). SUUR associates with active replication replication  
131 forks and while loss of SUUR function results in increased replication fork progression,  
132 overexpression of SUUR drastically inhibits replication fork progression without affecting origin

133 firing (Nordman et al., 2014; Sher et al., 2012). These findings, together with previous work  
134 showing that loss of SUUR function has no influence on ORC binding (Sher et al., 2012) and that  
135 SUUR associates with euchromatin in an S phase-dependent manner (Kolesnikova et al., 2013),  
136 further supports SUUR as a direct inhibitor of replication fork progression within specific  
137 regions of the genome. The mechanism through which SUUR is recruited to replication forks  
138 and how it inhibits their progression remains poorly understood.

139

140 Here we investigate how SUUR is recruited to replication forks and how it inhibits fork  
141 progression. We show that localization of SUUR to replication forks, but not heterochromatin, is  
142 dependent on its SNF2 domain. We identify a physical interaction between SUUR and the  
143 conserved replication factor Rif1. Importantly, we demonstrate that underreplication is  
144 dependent on *Rif1*. Critically, we have shown that Rif1 localizes to replication forks in an SUUR-  
145 dependent manner, where it acts downstream of SUUR to control replication fork progression.  
146 Our findings provide mechanistic insight into the process of underreplication and define a new  
147 function for Rif1 in replication control.

148

149

150

151

152

153

154

155 **RESULTS:**

156 **The SNF2 domain is essential for SUUR function and replication fork localization**

157 As a first step in understanding the mechanism of SUUR function, we wanted to define how it is  
158 localized to replication forks. SUUR has only one conserved domain: a SNF2-like domain in its N-  
159 terminal region that is predicted to be defective for ATP binding and hydrolysis (Makunin et al.,  
160 2002; Nordman and Orr-Weaver, 2015). To study the function of SUUR's SNF2 domain, we  
161 generated a mutant in which the SNF2 domain was deleted and the resulting mutant protein  
162 was expressed under the control of the endogenous *SuUR* promoter. This mutant, *SuUR*<sup>ΔSNF</sup>,  
163 was then crossed to an *SuUR* null mutant so that it was the only form of the the SUUR protein  
164 present. We tested the function of the *SuUR*<sup>ΔSNF</sup> mutant protein by assessing its ability to  
165 promote underreplication in the larval salivary gland. We purified genomic DNA from larval  
166 salivary glands isolated from wandering 3<sup>rd</sup> instar larvae and generated genome-wide copy  
167 number profiles using Illumina-based sequencing. We compared the results we obtained from  
168 the *SuUR*<sup>ΔSNF</sup> mutant to copy number profiles from wild-type (WT) and *SuUR* null mutant  
169 salivary glands. To identify underreplicated domains, we used CNVnator, which identifies copy  
170 number variants (CNVs) based on a statistical analysis of read depth (Abyzov et al., 2011). To be  
171 called as underreplicated, regions must not be called as underreplicated in 0-2 hour embryo  
172 samples that have uniform copy number and must be larger than 10kb.

173

174 The effect of deleting the SNF2 domain was qualitatively and quantitatively similar to the *SuUR*  
175 null mutant. Qualitatively, underreplication was suppressed in the *SuUR*<sup>ΔSNF</sup> mutant and the  
176 copy number profile was similar to the *SuUR* null mutant (Figure 1B and Supplemental Figure



177 1). Quantitatively, out of the 90 underreplicated sites identified in WT salivary glands, 59 were  
178 not detected in the *SuUR*<sup>ΔSNF</sup> mutant (Supplementary Table 1) and copy number was  
179 significantly increased in the euchromatic underreplicated domains similar to the *SuUR* null  
180 mutant (Figure 1C). We validated our deep-sequencing findings using quantitative droplet  
181 digital PCR (ddPCR) at four underreplicated domains (Figure 1D). Our findings show that the  
182 SNF2-like domain of SUUR is necessary to promote underreplication.

183

184 To determine if the SUUR<sup>ΔSNF</sup> protein was still able to associate with chromatin, we localized  
185 SUUR and the SUUR<sup>ΔSNF</sup> mutant proteins in ovarian follicle cells. During follicle cell  
186 development, these cells undergo programmed changes in their cell cycle and DNA replication  
187 programs (Claycomb and Orr-Weaver, 2005; Hua and Orr-Weaver, 2017). At a precise time in  
188 their differentiation program, follicle cells cease genomic replication and amplify six defined  
189 sites of their genome through a re-replication based mechanism. Early in this gene amplification  
190 process, both initiation and elongation phases of replication are coupled. Later in the process,  
191 however, initiation no longer occurs and active replication forks can be visualized by pulsing  
192 amplifying follicle cells with 5-ethynyl-2'deoxyuridine (EdU) (Claycomb et al., 2002). Active  
193 replication forks resolve into a double-bar structure, where each bar represents a series of  
194 active replication forks travelling away from the origin of replication (Claycomb and Orr-  
195 Weaver, 2005). By monitoring SUUR localization in amplifying follicle cells, we can  
196 unambiguously determine if SUUR associates with active replication forks.

197

198 SUUR has two distinct modes of chromatin association during the endo cycle. It constitutively  
199 localizes to heterochromatin and dynamically associates with replication forks (Kolesnikova et  
200 al., 2013; Nordman et al., 2014; Swenson et al., 2016). In agreement with previous studies,  
201 SUUR localized to both replication forks and heterochromatin in amplifying follicle cells (Figure  
202 1E) (Nordman et al., 2014). In contrast, the SUUR<sup>ΔSNF</sup> mutant localized to heterochromatin, but  
203 its recruitment to active replication forks was severely reduced (Figure 1E). Together, these  
204 results demonstrate that the SNF2 domain is important for SUUR recruitment to replication  
205 forks and is essential for SUUR-mediated underreplication.

206

#### 207 **SUUR associates with Rif1**

208 Interestingly, overexpression of the SNF2 domain and C-terminal portion of SUUR have  
209 different underreplication phenotypes. Whereas overexpression of the C-terminal two-thirds of  
210 SUUR promotes underreplication (Kolesnikova et al., 2005), overexpression of the SNF2 domain  
211 suppresses underreplication in the presence of endogenous SUUR (Kolesnikova et al., 2005).  
212 The C-terminal region of SUUR, however, has no detectable homology or conserved domains  
213 (Makunin et al., 2002). These observations, together with our own results demonstrating that  
214 the SNF2 domain of SUUR is responsible its localization to replication forks, led us to  
215 hypothesize that SUUR is recruited to replication forks through its SNF2 domain where it could  
216 recruit an additional factor(s) through its C-terminus to inhibit replication fork progression.

217

218 To test the hypothesis that a critical factor interacts with the C-terminal region of SUUR to  
219 promote underreplication, we used immunoprecipitation mass spectrometry studies to identify

220 SUUR-interacting proteins. We generated flies that expressed FLAG-tagged full length SUUR or  
221 the SNF2 domain of SUUR, immunoprecipitated these constructs and identified associated  
222 proteins through mass spectrometry. If SUUR recruits a factor to replication forks outside of its  
223 SNF2 domain, then we would expect this factor to be present only in full length purifications  
224 and not in the SNF2 domain purification. A single protein fulfilled this criteria: Rif1 (Table 1).  
225 This result raises the possibility Rif1 works together with SUUR to inhibit replication fork  
226 progression.

227

### 228 **Underreplication is dependent on Rif1**

229 If SUUR recruits Rif1 to replication forks to promote underreplication, then underreplication  
230 should be dependent on *Rif1*. To test this hypothesis, we used CRISPR-based mutagenesis to  
231 generate *Rif1* null mutants in *Drosophila* (Bassett et al., 2013; Gratz et al., 2013) (Figure 2A).  
232 Western blot analysis of ovary extracts from two deletion mutants, *Rif1*<sup>1</sup> and *Rif1*<sup>2</sup>, show no  
233 detectable Rif1 protein (Supplemental Figure 2A). Also, no signal was detected in the *Rif1*<sup>1</sup>/*Rif1*<sup>2</sup>  
234 mutant by immunofluorescence (Supplemental Figure 2B). The *Rif1*<sup>1</sup>/*Rif1*<sup>2</sup> null mutant was  
235 viable and fertile showing only a modest defect in embryonic hatch rate relative to wild-type  
236 flies with a 92% hatch rate for wild type embryos vs. 88% for the *Rif1*<sup>1</sup>/*Rif1*<sup>2</sup> mutant embryos  
237 (Supplemental Figure 2C). This is in contrast to a previous a study reporting *Rif1* is essential in  
238 *Drosophila* (Sreesankar et al., 2015). Rif1's essentiality, however, was based on RNAi and not a  
239 mutation of the *Rif1* gene (Sreesankar et al., 2015). The most likely explanation for this  
240 discrepancy is that the lethality in the RNAi experiments was due to an off-target effect.

241

242 To determine if *Rif1* is necessary for underreplication, we dissected salivary glands from  
243 *Rif1<sup>1</sup>/Rif1<sup>2</sup>* (herein referred to as *Rif1<sup>-</sup>*) heterozygous larvae and extracted genomic DNA for  
244 Illumina-based sequencing to measure changes in DNA copy number. Strikingly,  
245 underreplication is abolished upon loss of Rif1 function (Figure 2B and C; Supplemental Figure  
246 3). We validated our sequence-based copy number assays with quantitative PCR at a subset of  
247 underreplicated regions using ddPCR (Figure 2D). Furthermore, we determined the read density  
248 at all euchromatic sites of underreplication called in our wild-type samples, which quantitatively  
249 demonstrates that Rif1 is essential for underreplication (Figure 2C). These results demonstrate  
250 that underreplication is dependent on *Rif1*.

251

252 It is possible that the *Rif1* mutant indirectly influences underreplication through changes in  
253 replication timing. Underreplicated domains, both euchromatic and heterochromatic, tend to  
254 be late replicating regions of the genome (Belyaeva et al., 2012; Makunin et al., 2002).  
255 Therefore, if these regions replicated earlier in S phase in a *Rif1* mutant, then this change could  
256 prevent their underreplication. In fact, SUUR associates with late replicating regions of the  
257 genome (Filion et al., 2010; Pindyurin et al., 2007). Due to their large polyploid nature, salivary  
258 glands cells cannot be sorted to perform genome-wide replication timing experiments. Because  
259 heterochromatin replicates exclusively in late S phase, however, late replication can be  
260 visualized when EdU is incorporated exclusively in regions of heterochromatin. To assess if *Rif1*  
261 mutants have a clear pattern of late replication in larval salivary glands, we isolated salivary  
262 glands from early 3<sup>rd</sup> instar larvae, which are actively undergoing endo cycles. We pulsed these  
263 salivary glands with EdU to visualize sites of replication and co-stained with an anti-HP1

264 antibody to mark heterochromatin. In wild-type salivary glands, only rarely (1 of 238 EdU<sup>+</sup> cells;  
265 0.4%) did we detect EdU incorporation in regions of heterochromatin (Supplemental Figure 4).  
266 This is consistent with the lack of heterochromatin replication due to underreplication. In  
267 contrast, in both *SuUR* and *Rif1* mutants, we could readily detect cells that were solely  
268 incorporating EdU within regions of heterochromatin (32 of 327 EdU<sup>+</sup> cells; 9.8% for *SuUR* and  
269 70 of 385 EdU<sup>+</sup> cells; 18.2% for *Rif1*) (Supplemental Figure 4). Therefore, we conclude that *Rif1*  
270 mutants still have a clear pattern of late replication. Given that heterochromatin  
271 underreplication is suppressed in a *Rif1* mutant, although it is still late replicating, indicates that  
272 replication timing cannot solely explain the lack of underreplication associated with loss of *Rif1*  
273 function.

274  
275 While characterizing *Rif1*'s role in underreplication and patterns of DNA replication in endo  
276 cycling cells, we did observe differences in the heterochromatic regions of *SuUR* and *Rif1*  
277 mutants. First, although underreplication is suppressed in both mutants (Figure 2 and  
278 Supplemental Figure 3), the chromocenters were abnormally large in *Rif1* mutant relative to an  
279 *SuUR* mutant as observed by DAPI staining consistent with the 'fluffy' enlarged chromocenters  
280 seen in *Rif1* mutant mouse cells (Supplemental Figure 4) (Cornacchia et al., 2012). Although,  
281 this phenotype was present in all endo cycling cells, it was especially dramatic in the ovarian  
282 nurse cells (Supplemental Figure 5). Second, Illumina-based copy number profiles revealed an  
283 increase in copy number in some pericentric heterochromatin regions in the *Rif1* mutant  
284 relative to the *SuUR* mutant (Supplemental Figure 3). Collectively, these results suggest that  
285 heterochromatin is partially, but not fully replicated in *SuUR* mutant endo cycling cells,

286 consistent with previous cytological analysis (Demakova et al., 2007). In contrast, loss of Rif1  
287 function appears to completely restore heterochromatic replication in endo cycling cells.

288

289 **Rif1 affects replication fork progression.**

290 SUUR-mediated underreplication occurs through inhibition of replication fork progression  
291 (Nordman et al., 2014; Sher et al., 2012). If SUUR acts together with Rif1 to promote  
292 underreplication, then Rif1 is expected to control replication fork progression. DNA combing  
293 assays in human and mouse cells from multiple groups have come to different conclusions as to  
294 whether Rif1 affects replication fork progression (Alver et al., 2017; Cornacchia et al., 2012;  
295 Hiraga et al., 2017; Yamazaki et al., 2012). Rif1, however, has been shown to be associated with  
296 replication forks through nascent chromatin capture, an iPOND-like technique used to isolate  
297 proteins associated with active replication forks (Alabert et al., 2014). To determine directly if  
298 Rif1 controls replication fork progression, we performed copy number assays on amplifying  
299 follicle cells.

300

301 Gene amplification in ovarian follicle cells occurs at six discrete sites in the genome through a  
302 re-replication based mechanism. Copy number profiling of these amplified domains provides a  
303 quantitative assessment of the number of rounds of origin firing and the distance replication  
304 forks have travelled during the amplification process, allowing us to disentangle the initiation  
305 and elongation phases of DNA replication. To determine if Rif1 affects origin firing and/or  
306 replication fork progression, we isolated wild-type and *Rif1* mutant stage 13 egg chambers,  
307 which represent the end point of the amplification process, and made quantitative DNA copy

308 number measurements. Loss of Rif1 function resulted in an increase in replication fork  
309 progression without significantly affecting copy number at the origin of replication at all sites of  
310 amplification (Figure 3A).

311

312 To quantify the changes in fork progression we observed at sites of amplification, we  
313 computationally determined the peak of amplification and the region on each arm of the  
314 amplified domain that represents one half of the copy number at the highest point of the  
315 amplicon (Nordman et al., 2014). This quantitative analysis of origin firing and replication fork  
316 progression revealed that origin firing was not affected in the *Rif1* mutant, as no major change  
317 in copy number was detected at the origin of replication when comparing wild type and *Rif1*  
318 mutant stage 13 follicle cells (Supplemental Table 2). In contrast, the width of each replication  
319 gradient, which represents the rate of fork progression, was significantly increased at all sites of  
320 amplification (Figure 3A; Supplemental Table 2). Based on the observation that the *Rif1* mutant  
321 does not affect origin firing, but specifically affects the distance replication forks travel during  
322 the gene amplification process, we conclude that Rif1 regulates replication fork progression.

323

324 Given that the *Rif1* mutant phenocopies an *SuUR* mutant with respect to replication fork  
325 progression, we next wanted to determine the cause of increased replication fork progression  
326 at amplified loci upon loss of Rif1 function. Previously, it was shown that a prolonged period of  
327 gene amplification in the *SuUR* mutant gives rise to the extended replication gradient at sites of  
328 amplification (Nordman et al., 2014). Gene amplification starts synchronously in all follicle cells  
329 at stage 10B of egg chamber development (Calvi et al., 1998). By the end of gene amplification,

330 however, only a subset of follicle cells display visual amplification foci as judged by EdU  
331 incorporation (Nordman et al., 2014). To determine if Rif1 controls replication fork progression  
332 by increasing the period of gene amplification comparable to an *SuUR* mutant, we quantified  
333 the fraction of stage 13 follicle cells that were EdU positive. Similar to an *SuUR* mutant, loss of  
334 Rif1 function also resulted in a prolonged period of EdU incorporation with 34% of follicle cells  
335 visibly incorporating EdU in wild type follicle cells, 100% in an *SuUR* mutant and 98.5% in the  
336 *Rif1* mutant (Figure 3B). This results suggests that Rif1 has a destabilizing effect on replication  
337 forks, resulting in a premature cessation of replication fork progression.

338

### 339 **Rif1 acts downstream of SUUR**

340 Rif1 could control SUUR activity and underreplication by at least two different mechanisms. Rif1  
341 could act upstream of SUUR and directly or indirectly regulate SUUR's ability to associate with  
342 chromatin. For example, Histone H1 and HP1 affect underreplication by influencing SUUR's  
343 ability to associate with chromatin (Andreyeva et al., 2017; Pindyurin et al., 2008). Alternatively,  
344 Rif1 could act downstream of SUUR to control replication fork progression. We sought to  
345 distinguish between these possibilities by determining whether SUUR could still associate with  
346 replication forks in the absence of Rif1 function.

347

348 To monitor SUUR's association with heterochromatin and replication forks in the same cell  
349 type, we localized SUUR in amplifying follicle cells where replication forks (double bars) and  
350 heterochromatin (chromocenter) can be visualized unambiguously, in the presence and  
351 absence of Rif1. SUUR localized to both replication forks and heterochromatin in the absence of



352 Rif1 function (Figure 4). Therefore, we conclude that Rif1 acts downstream of SUUR to inhibit  
353 fork progression and that SUUR lacks the ability to inhibit replication fork progression in the  
354 absence of Rif1.

355

356 **Rif1 localizes to active replication forks.**

357 Although our genetic data indicate that Rif1 affects replication fork progression, we wanted to  
358 determine if Rif1 controls replication fork progression through a direct or indirect mechanism. If  
359 Rif1 directly influences replication fork progression and/or stability, then it should localize to  
360 active replication forks. To assess this possibility, we visualized Rif1 localization during gene  
361 amplification in follicle cells using a Rif1-specific antibody (Supplemental Figure 2).

362 Rif1 localization pattern was strikingly similar to that of SUUR. First, Rif1 is localized to  
363 heterochromatin in all amplification stages amplifying follicle cells (Figure 5). Second, Rif1  
364 localized to sites of amplification even prior to the formation of double bar structures, with  
365 weak staining in early stage follicle cells and more intense staining as amplification progressed.  
366 Third, in the later stages of gene amplification Rif1 was localized to active replication forks.

367 Taken together, these results demonstrate that Rif1 dynamically associates with the replication  
368 forks to regulate their progression.

369

370 **SUUR is required to retain Rif1 at replication forks.**

371 Based on our observations that SUUR physically associates with Rif1 and that a *Rif1* mutant  
372 phenocopies an *SuUR* mutant, we hypothesized that SUUR recruits a Rif1/PP1 complex to  
373 replication forks. If true, then Rif1 association with replication forks should be at least partially

374 dependent on SUUR. To test this hypothesis, we monitored the localization of Rif1 in *SuUR*  
375 mutant amplifying follicle cells. We found that Rif1's association with replication forks was  
376 largely dependent on SUUR, as the Rif1 signal was lost in late stage amplifying follicle cells in an  
377 *SuUR* mutant (Figure 5). Rif1's recruitment to replication foci, however, was not completely  
378 dependent on SUUR. In a subset of stage 10B and 11 egg chambers, when both initiation of  
379 replication and fork progression are still coupled, we observed Rif1 localization to amplification  
380 foci in a subset of follicle cells (data not shown). Rif1 staining was lost, however, in stage 12 and  
381 13 egg chambers. We conclude that while the initial recruitment of Rif1 to sites of amplification  
382 is not completely dependent on SUUR, SUUR is necessary to retain Rif1 at replication forks.

383

#### 384 **The PP1-interacting motif of Rif1 is necessary for underreplication**

385 Because Rif1 is known to recruit PP1 to replication origins to regulate initiation, this led us to  
386 ask if the same interaction between Rif1 and PP1 is important for Rif1's regulation of replication  
387 fork progression. Rif1 associates with Protein Phosphatase 1 (PP1) through a conserved  
388 interaction motif, thereby recruiting PP1 to MCM complexes and inactivating them (Davé et al.,  
389 2014; Hiraga et al., 2017; 2014). Based on this model of Rif1 function, we wanted to determine  
390 if Rif1's ability to interact with PP1 was necessary for Rif1-mediated underreplication. We used  
391 CRISPR-based mutagenesis to mutate the conserved SILK/RSVF PP1 interaction motif to  
392 SAAK/RASA. Western blot analysis showed that mutation of the SILK/RSVF motif did not affect  
393 protein stability (Supplemental Figure 6). Mutation of this motif has been shown to disrupt the  
394 Rif1/PP1 interaction in organisms from yeast to humans (Alver et al., 2017; Davé et al., 2014;  
395 Hiraga et al., 2017; 2014; Mattarocci et al., 2014; Sreesankar et al., 2015; Sukackaite et al.,

396 2017). We isolated salivary glands from *Rif1<sup>PP1</sup>* mutant wandering 3<sup>rd</sup> instar larvae, extracted  
397 DNA and measured the copy number of multiple underreplicated domains. Similar to the *Rif1*  
398 mutant, underreplication was completely abolished in the *Rif1<sup>PP1</sup>* mutant (Figure 6A). Thus, a  
399 Rif1/PP1 complex is necessary to promote underreplication.

400

401

## 402 **DISCUSSION:**

403 The SUUR protein is responsible for promoting underreplication of heterochromatin and many  
404 euchromatin regions of the genome. Although SUUR was recently shown to promote  
405 underreplication through inhibition of replication fork progression, the underlying molecular  
406 mechanism has remained unclear. Through biochemical, genetic, genomic and cytological  
407 approaches, we have found that SUUR recruits Rif1 to replication forks and that Rif1 is  
408 responsible for underreplication. This model is supported by several independent lines of  
409 evidence. First, SUUR physically associates with Rif1, and SUUR and Rif1 co-localize at sites of  
410 replication. Second, underreplication is dependent on Rif1, although Rif1 mutants have a clear  
411 pattern of late replication in endo cycling cells. Third, SUUR localizes to replication forks and  
412 heterochromatin in a *Rif1* mutant, however, it is unable to inhibit replication fork progression in  
413 the absence of Rif1. Fourth, Rif1 directly controls replication fork progression and phenocopies  
414 the effect loss of SUUR function has on replication fork progression. Fifth, SUUR is required for  
415 Rif1 localization to replication forks. Critically, using the gene amplification model to separate  
416 initiation and elongation of replication, we have shown that Rif1 can affect fork progression

417 without altering the extent of initiation. Based on these observations, we have defined a new  
418 function of Rif1 as a direct regulator of replication fork progression.

419

#### 420 ***SNF2 domain and fork localization***

421 Our work suggests that the SNF2 domain of SUUR is critical for its ability to localize to  
422 replication forks. This is based on the observation that deletion of this domain results in a  
423 protein that is unable to localize to replication forks, but still localizes to heterochromatin.  
424 SUUR has previously been shown to dynamically localize to replication forks during S phase, but  
425 constitutively binds to heterochromatin (Kolesnikova et al., 2013; Nordman et al., 2014). SUUR  
426 associates with HP1 and this interaction occurs between the central region of SUUR and HP1.  
427 (Pindyurin et al., 2008). Therefore, we speculate that the interaction between SUUR and HP1 is  
428 responsible for constitutive SUUR localization to heterochromatin, while a different interaction  
429 between the SNF2 domain and a yet to be defined component of the replisome, or replication  
430 fork structure itself, recruits SUUR to active replication forks during S phase.

431

432 Uncoupling of SUUR's ability to associate with replication forks and heterochromatin also  
433 provides a new level of mechanistic understanding of underreplication. Overexpression of the  
434 C-terminal two-thirds of SUUR is capable of inducing ectopic sites of underreplication. In  
435 contrast, overexpression of the SUUR's SNF2 domain, in the presence of endogenous SUUR,  
436 suppresses SUUR-mediated underreplication (Kolesnikova et al., 2005). Together with the data  
437 presented here, we suggest that overexpression of the SNF2 domain interferes with  
438 recruitment of full-length SUUR to replication forks, by saturating potential SUUR binding sites

439 at the replication fork. Although the C-terminal region of SUUR is necessary to induce  
440 underreplication (Kolesnikova et al., 2005), the C-terminal portion of SUUR remains associated  
441 with heterochromatin in the SuUR<sup>ΔSNF</sup> construct, but this protein is not sufficient to induce  
442 underreplication. We suggest that at physiological levels, the affinity of SUUR with replication  
443 forks is substantially diminished in the absence of the SNF2 domain. Our work raises questions  
444 about the biological significance of SUUR binding to heterochromatin, since without the SNF2  
445 domain SUUR is still constitutively bound to heterochromatin, yet unable to induce  
446 underreplication. Additionally, SUUR dynamically associates with heterochromatin in mitotic  
447 cells although heterochromatin is fully replicated (Swenson et al., 2016).

448

#### 449 ***Rif1 controls underreplication***

450 While trying to uncover the molecular mechanism through which SUUR is able to inhibit  
451 replication fork progression, we have uncovered a physical interaction between SUUR and Rif1.  
452 Through subsequent analysis, we demonstrated that Rif1 has a direct role in copy number  
453 control and that Rif1 acts downstream of SUUR in the underreplication process. Although  
454 underreplication is largely dependent on SUUR, there are several sites that display a modest  
455 degree of underreplication in the absence of SUUR (Demakova et al., 2007; Sher et al., 2012). In  
456 a Rif1 mutant, however, these sites are fully replicated and there is no longer any detectable  
457 levels of underreplication within any regions of the genome. It is possible that Rif1 is capable of  
458 promoting underreplication through a mechanism independent of SUUR. Therefore, we  
459 conclude that Rif1 is a critical factor in driving underreplication.

460

461 Further emphasizing the critical role Rif1 plays in copy number control, we have shown that Rif1  
462 acts downstream of SUUR in promoting underreplication. SUUR is still able to associate with  
463 chromatin in the absence of Rif1, but is unable to promote underreplication. Underreplicated  
464 regions of the genome, including heterochromatin, tend to be late replicating, raising the  
465 possibility that changes in replication timing in a *Rif1* mutant suppresses underreplication. *Rif1*  
466 mutant endo cycling cells of *Drosophila* display a cytological pattern of late replication, where  
467 heterochromatin is discretely replicated. While Rif1 is likely to control replication timing in  
468 *Drosophila*, we argue that the changes in copy number associated with loss of Rif1 function are  
469 not solely due to a loss of late replication. This is supported by the clear pattern of late  
470 replication of heterochromatin in *Rif1* mutant endo cycling cells, although heterochromatin  
471 appears to be fully replicated in these cells. Previous work in mammalian polyploid cells has  
472 shown that underreplication is dependent on Rif1, which was attributed to changes in  
473 replication timing (Hannibal and Baker, 2016). It is important to note that Rif1-dependent  
474 changes in replication timing were not measured in this system and that many genomic regions  
475 transition from early to late replication in a *Rif1* mutant (Foti et al., 2015). Our work raises the  
476 possibility that Rif1 has a direct role in mammalian underreplication through a mechanism  
477 similar to that of *Drosophila* and may not simply be due to indirect changes in replication  
478 timing. Future work will be necessary to define the role of mammalian Rif1 in underreplication.

479

#### 480 ***Rif1 regulates replication fork progression***

481 Our analysis of amplification loci demonstrates that Rif1 controls replication fork progression  
482 independently of initiation control, thus demonstrating that Rif1 has a specific effect on

483 replication fork progression. Therefore, we have uncovered a new role for Rif1 in DNA  
484 metabolism as a regulator of replication fork progression. Rif1 has been identified as part of the  
485 replisome in human cells by nascent chromatin capture, a technique that identifies proteins  
486 associated with newly synthesized chromatin (Alabert et al., 2014). Multiple studies have  
487 assessed whether loss of Rif1 function affects replication fork progression in yeast, mouse and  
488 human cells, but have come to different conclusions (Alver et al., 2017; Cornacchia et al., 2012;  
489 Hiraga et al., 2017; Yamazaki et al., 2012). DNA fiber assays have been used to measure fork  
490 progression in these studies and nearly all have shown that *Rif1* mutants have a slight increase  
491 in replication fork progression although not always statistically significant. There could be  
492 several reasons for these differing results; Rif1 may control replication fork progression in  
493 specific genomic regions that may be underrepresented in some assays, Rif1 function could  
494 vary among different cell types, or sample sizes may have been too small to reach significance.  
495 Our observations, taken together with these previous studies, leave open the possibility that  
496 Rif1-mediated control of replication fork progression could be an evolutionarily conserved  
497 function of Rif1. We do not suggest that Rif1 is constitutively associated with replication forks in  
498 all cell types. Rather, Rif1 could be recruited to replication forks at a specific time in S phase, or  
499 in specific developmental contexts, to modulate the progression of replication forks and  
500 provide an additional layer of regulation of the DNA replication program.

501

502 How could SUUR and Rif1 function in concert to inhibit replication fork progression? We have  
503 shown that Rif1 retention at replication forks is dependent on SUUR. Additionally,  
504 underreplication depends on Rif1's ability to interact with PP1. Rif1/PP1 dephosphorylates

505 DDK-activated helicases to control replication initiation (Davé et al., 2014; Hiraga et al., 2017;  
506 2014). More recently, however, DDK-phosphorylated MCM subunits were shown to be  
507 necessary to maintain CMG association and stability of the helicase (Alver et al., 2017). This  
508 result suggests that continued phosphorylation of the helicase is necessary for replication fork  
509 progression (Alver et al., 2017). We propose that SUUR recruits Rif1/PP1 to replication forks  
510 where it is able to dephosphorylate MCM subunits, ultimately inhibiting replication fork  
511 progression. Although this mechanism needs to be tested biochemically, it provides a  
512 framework to address the underlying molecular mechanism responsible for controlling DNA  
513 copy number and could provide new insight into the mechanism(s) Rif1 employs to regulate  
514 replication timing.

515

516

517

518

519

520

521

522

523

524

525

526



527 **MATERIALS AND METHODS**

528

529 Strain list:

530 WT – Oregon R

531  $SuUR^- - w^{118}; SuUR^{ES}$

532  $SuUR^{\Delta SNF} - SuUR^{ES}, PBac\{w^+ SuUR^{\Delta SNF}\}$

533  $Rif1^- - w^{118}; Rif1^1 / Rif1^2$

534  $Rif1^{PP1} - w^{118}; Rif1^{PP1}$

535

536 *BAC-mediated recombineering:*

537 BAC-mediated recombineering (Sharan et al., 2009) was used to delete the portion of the *SuUR*

538 gene corresponding to the SNF2 domain. An *attB-P[acman]* clone with a 21-kb genomic region

539 containing the *SuUR* and a *galk* insertion in the *SuUR* coding region (described in (Nordman et

540 al., 2014)) was used as a starting vector. Next, a gene block (IDT) was used to replace the *galk*

541 cassette and generate a precise deletion within the *SuUR* gene. The resulting vector was

542 verified by fingerprinting, PCR and sequencing. The  $SuUR^{\Delta SNF}$  BAC was injected into a strain

543 harboring the *86F8* landing site (Best Gene Inc.).

544

545 *Generation of heat shock-inducible, FLAG tagged SuUR transgenic lines:*

546 The portion of the *SuUR* gene encoding the SNF2 domain (amino acids 1 to 278) was fused to

547 the SV40 NLS (Barolo et al., 2000) and a 3X-FLAG tag sequence was added to the 5' end of *SuUR*

548 *SNF2* sequence. The resulting construct was cloned into the pCaSpeR-hs vector (Thummel and

549 Pirrotta, V.: Drosophila Genomics Resource Center) using the NotI and XbaI restriction sites. A  
550 3X-FLAG tag sequence was added to the 5' end of of the *SuUR* coding region and cloned into  
551 the pCaSpeR-hs vector also using the NotI and XbaI restriction sites. The resulting constructs  
552 were verified by sequencing and injected into a *w<sup>1118</sup>* strain (Best Gene Inc.).

553

#### 554 *CRISPR mutagenesis:*

555 To generate null alleles of *Rif1*, gRNAs targeting the 5' and 3' ends of the *Rif1* gene were cloned  
556 into the pU6-BbsI plasmid as described (Gratz et al., 2015) using the DRSC Find CRISPRs tool  
557 (<http://www.flyrnai.org/crispr2/index.html>). Both gRNAs were co-injected into a *nos-Cas9*  
558 expression stock (Best Gene Inc.). Surviving adults were individually crossed to *CyO/Tft*  
559 balancer stock and *CyO*-balanced progeny were screened by PCR for a deletion of the *Rif1*  
560 locus. Stocks harboring a deletion were further characterized by sequencing. Both *Rif1<sup>1</sup>* and  
561 *Rif1<sup>2</sup>* mutants had substantial deletions of the *Rif1* gene and both had frame shift mutations  
562 early in the coding region. *Rif1<sup>1</sup>* has a frame shift mutation at amino acid 14, whereas *Rif1<sup>2</sup>* has  
563 a frame shift mutation at amino acid 11.

564

565 To generate a *Rif1* allele defective for PP1 binding, the pU6-BbsI vector expressing the gRNA  
566 targeting the 3' end of *Rif1* was co-injected with a recovery vector that contained the  
567 mutagenized SILK and RVSV (SAAK and RASA) sites with 1kb of homology upstream and  
568 downstream of the mutagenized region. Surviving adults were crossed as above and screened  
569 by sequencing.

570

571 *Cytological analysis and microscopy:*

572 Ovaries were dissected from females fattened for two days on wet yeast in Ephrussi Beadle  
573 Ringers (EBR) medium (Beadle and Ephrussi, 1935). Ovaries were pulsed with 5-ethynyl-2-  
574 deoxyuridine (EdU) for 30 minutes, fixed in 4% formaldehyde and prepared for  
575 immunofluorescence (IF) as described (Nordman et al., 2014).

576

577 For IF using both anti-Rif1 and anti-SUUR antibodies, ovaries were dissected, pulsed with 50 $\mu$ M  
578 EdU and fixed. Ovaries were then incubated in primary antibody (1:200) overnight at 4°C. Alexa  
579 Fluor secondary antibodies (ThermoFisher) were used at a dilution of 1:500 for 2 hours at room  
580 temperature. EdU detection was performed after incubation of the secondary antibody using  
581 Click-iT Alexa Fluor-555 or -488 (Invitrogen). All images were obtained using a Nikon Ti-E  
582 inverted microscope with a Zyla sCMOS digital camera. Images were deconvolved and  
583 processed using NIS-Elements software (Nikon).

584

585 For salivary gland IF, 3<sup>rd</sup> instar larvae were collected prior to the wandering stage. Salivary  
586 glands were dissected in EBR, pulsed with 50 $\mu$ M EdU for 30 minutes and fixed with 4%  
587 formaldehyde. Salivary glands were incubated in anti-HP1 antibody (Developmental Studies  
588 Hybridoma Bank; C1A9) overnight at 4°C. Alexa Fluor secondary antibodies staining and Click-iT  
589 EdU labeling were performed as described above.

590

591 *Rif1 antibody production:*

592 Rif1 antiserum was produced in guinea pigs and rabbits (Cocalico Biologicals Inc.). Briefly, a Rif1  
593 protein fragment from residues 694-1094 (Sreesankar et al., 2012) was C-terminally six-  
594 histidine tagged and expressed in *E. coli* Rossetta DE3 cells and purified using Ni-NTA  
595 Agarose beads (Qiagen). The purified protein was used for injection (Cocalico Biologicals Inc.)  
596 and serum was affinity purified as described (Moore and Orr-Weaver, 1998). Affinity purified  
597 guinea pig anti-Rif1 antibody was used for immunofluorescence.

598

599 *IP-mass spec:*

600 Flies containing heat shock-inducible *SuUR* transgenes were expanded into population cages. 0-  
601 24 hour embryos were collected, incubated at 37°C for one hour, and allowed to recover for  
602 one hour following heat shock treatment. Wild-type embryos were used as a negative control.  
603 Embryos were dechorionated in bleach and fixed for 20 minutes in 2% formaldehyde.  
604 Approximately 0.5g of fixed and dechorionated embryos were used for each replicate. Embryos  
605 were disrupted by douncing in Buffer 1 (Shao et al., 1999), followed by centrifugation at 3,000 x  
606 g for 2 minutes at 4°C and resuspended in lysis buffer 3 (MacAlpine et al., 2010) . Chromatin  
607 was prepared by sonicating nuclei for a total of 40 cycles of 30" ON and 30" OFF at max power  
608 using a Bioruptor 300 (Diagenode) with vortexing and pausing after every 10 cycles. Cleared  
609 lysates were incubated with anti-FLAG M2 affinity gel (Sigma) for 2 hours at 4°C. After extensive  
610 washing in LB3 and LB3 with 1M NaCl, proteins were eluted using 3X FLAG peptide (Sigma).  
611 Crosslinks were reversed by boiling purified material in Laemmli buffer with  $\beta$ -mercaptoethanol  
612 for 20 minutes.

613

614 Immunoprecipitated samples were separated on a 4-12% NuPAGE Bis-Tris gel (Invitrogen),  
615 proteins were stained with Novex colloidal Coomassie stain (Invitrogen), and destained in  
616 water. Coomassie stained gel regions were cut from the gel and diced into 1mm<sup>3</sup> cubes.  
617 Proteins were reduced and alkylated, destained with 50% MeCN in 25mM ammonium  
618 bicarbonate, and in-gel digested with trypsin (10ng/uL) in 25mM ammonium bicarbonate  
619 overnight at 37°C. Peptides were extracted by gel dehydration with 60% MeCN, 0.1% TFA, the  
620 extracts were dried by speed vac centrifugation, and reconstituted in 0.1% formic acid.  
621 Peptides were analyzed by LC-coupled tandem mass spectrometry (LC-MS/MS). An analytical  
622 column was packed with 20cm of C18 reverse phase material (Jupiter, 3 µm beads, 300Å,  
623 Phenomenox) directly into a laser-pulled emitter tip. Peptides were loaded on the capillary  
624 reverse phase analytical column (360 µm O.D. x 100 µm I.D.) using a Dionex Ultimate 3000  
625 nanoLC and autosampler. The mobile phase solvents consisted of 0.1% formic acid, 99.9%  
626 water (solvent A) and 0.1% formic acid, 99.9% acetonitrile (solvent B). Peptides were gradient-  
627 eluted at a flow rate of 350 nL/min, using a 120-minute gradient. The gradient consisted of the  
628 following: 1-3min, 2% B (sample loading from autosampler); 3-98 min, 2-45% B; 98-105 min, 45-  
629 90% B; 105-107 min, 90% B; 107-110 min, 90-2% B; 110-120 min (column re-equilibration), 2%  
630 B. A Q Exactive HF mass spectrometer (Thermo Scientific), equipped with a nanoelectrospray  
631 ionization source, was used to mass analyze the eluting peptides using a data-dependent  
632 method. The instrument method consisted of MS1 using an MS AGC target value of 3e6,  
633 followed by up to 15 MS/MS scans of the most abundant ions detected in the preceding MS  
634 scan. A maximum MS/MS ion time of 40 ms was used with a MS2 AGC target of 1e5. Dynamic  
635 exclusion was set to 20s, HCD collision energy was set to 27 nce, and peptide match and isotope

636 exclusion were enabled. For identification of peptides, tandem mass spectra were searched  
637 with Sequest (Thermo Fisher Scientific) against a *Drosophila melanogaster* database created  
638 from the UniprotKB protein database ([www.uniprot.org](http://www.uniprot.org)). Search results were assembled using  
639 Scaffold 4.3.4 (Proteome Software).

640

641 *Genome-wide copy number profiling:*

642 Embryos were collected immediately after 2 hours of egg laying. Salivary glands were dissected  
643 in EBR from 50 wandering 3<sup>rd</sup> instar larvae per genotype and flash frozen. Ovaries were  
644 dissected from females fattened for two days on wet yeast in EBR and 50 stage 13 egg  
645 chambers were isolated for each genotype and flash frozen. Tissues were thawed on ice,  
646 resuspended in LB3 and dounced using a Kontes B-type pestle. Dounced homogenates were  
647 sonicated using a Bioruptor 300 (Diagenode) for 10 cycles of 30" on and 30" off at maximal  
648 power. Lysates were treated with RNase and Proteinase K and genomic DNA was isolated by  
649 phenol-chloroform extraction. Illumina libraries were prepared using NEB DNA Ultra II (New  
650 England Biolabs) following the manufacturers protocol. Barcoded libraries were sequenced  
651 using Illumina NextSeq500 platform.

652

653 *Bioinformatics:*

654 Reads were mapped to the *Drosophila* genome (BDGP Release 6) using BWA using default  
655 parameters (Li and Durbin, 2009). CNVnator 0.3.3 was used for the detection of  
656 underreplicated regions using a bin size of 1000 (Abyzov et al., 2011). Regions were identified  
657 as underreplicated if they were identified as underreplicated in 0-2h embryonic DNA and were

658 greater than 10kb in length. The number of reads for underreplicated regions was called by  
659 using bedtools multicov tool for the underreplicated and uncalled regions. Average read depth  
660 per region was determined by multiplying the number of reads in a region by the read length  
661 and dividing by the total region length. Read depth was normalized between samples by scaling  
662 the total reads obtained per sample. Statistical comparison between the regions was with a t-  
663 test. For read depth in pericentric heterochromatin regions, the chromatin arm was binned into  
664 10kb windows and the number of reads for each window was called using bedtools multicov  
665 using only uniquely mapped reads.

666

667 Half maximum analysis of amplicon copy number profiles was performed as described  
668 previously (Alexander et al., 2015; Nordman et al., 2014). Briefly,  $\log_2$  ratios were generated  
669 using bamCompare from deepTool 2.5.0 by comparing stage 13 follicle cell profiles to a 0-2h  
670 embryo sample. Smoothed  $\log_2$ -transformed data was used to determine the point of  
671 maximum copy number associated with each amplicon. The chromosome coordinate  
672 corresponding to half the maximum value for each arm of the amplicon was then determined.

673

#### 674 *Copy number analysis by droplet-digital PCR (ddPCR)*

675 Genomic DNA was extracted from salivary glands isolated from wandering 3<sup>rd</sup> instar larvae as  
676 described above. Primer sets annealing to the mid-point of the indicated UR regions were used  
677 (previously described in (Nordman et al., 2014; Sher et al., 2012)). ddPCR was performed  
678 according to manufacture's recommendations (BioRad). All ddPCR reactions were performed in  
679 triplicate from three independent biological replicates. The concentration value for each set of

680 primers in an underreplicated domain was divided by the concentration value of a fully  
681 replicated control to generate the bar graph. Error bars represent the SEM.

682

683 *Western blotting:*

684 Ovaries were dissected from females fattened for two days on wet yeast and suspended in  
685 Laemmli buffer supplemented with DTT. Ovaries were homogenized and boiled and extracts  
686 were loaded on a 4-20% Mini-PROTEAN TGX Stain-Free gel (BioRad). After electrophoresis the  
687 gel was activated and imaged according to the manufacturers recommendations. Protein was  
688 transferred to a PDVF membrane using a Trans-Blot Turbo Transfer System (BioRad). After  
689 blocking and incubation with antibodies, blots were imaged using an Amersham 600 CCD  
690 imager.

691

## 692 **DATA ACCESS**

693 Data sets described in this manuscript can be found under the GEO accession number:  
694 GSE114370.

695

## 696 **ACKNOWLEDGMENTS**

697 We thank Kristie Rose at the Vanderbilt Proteomics core for mass spectrometry and Olivia  
698 Koues from the VANTAGE core at Vanderbilt for Illumina sequencing. Terry Orr-Weaver,  
699 Stephen Bell, Katherine Friedman, James Dewar, Dave Cortez and members of the Nordman lab  
700 for providing critical comments on the manuscript. We thank Brooke Hamilton for assistance in



701 generating the *Rif1* mutants. This work was supported by an NIH R00 award 5R00GM104151 to  
702 J.T.N.

703

#### 704 **DISCLOSURE**

705 The authors have no conflicts of interest

706

707

#### 708 **REFERENCES**

709 Abyzov, A., Urban, A.E., Snyder, M., Gerstein, M., 2011. CNVnator: an approach to discover,  
710 genotype, and characterize typical and atypical CNVs from family and population genome  
711 sequencing. *Genome Res.* 21, 974–984. doi:10.1101/gr.114876.110

712

713 Aggarwal, B.D., Calvi, B.R., 2004. Chromatin regulates origin activity in *Drosophila* follicle cells.  
714 *Nature* 430, 372–376. doi:10.1038/nature02694

715

716 Alabert, C., Bukowski-Wills, J.-C., Lee, S.-B., Kustatscher, G., Nakamura, K., de Lima Alves, F.,  
717 Menard, P., Mejlvang, J., Rappsilber, J., Groth, A., 2014. Nascent chromatin capture  
718 proteomics determines chromatin dynamics during DNA replication and identifies unknown  
719 fork components. *Nature Cell Biology* 16, 281–293. doi:doi:10.1038/ncb2918

720

721 Alexander, J.L., Barrasa, M.I., Orr-Weaver, T.L., 2015. Replication fork progression during re-  
722 replication requires the DNA damage checkpoint and double-strand break repair. *Curr. Biol.*  
723 25, 1654–1660. doi:10.1016/j.cub.2015.04.058

724

725 Alver, R.C., Chadha, G.S., Gillespie, P.J., Blow, J.J., 2017. Reversal of DDK-Mediated MCM  
726 Phosphorylation by Rif1-PP1 Regulates Replication Initiation and Replisome Stability  
727 Independently of ATR/Chk1. *Cell Reports* 18, 2508–2520. doi:10.1016/j.celrep.2017.02.042

728

729 Andreyeva, E.N., Bernardo, T.J., Kolesnikova, T.D., Lu, X., Yarinich, L.A., Bartholdy, B.A., Guo, X.,  
730 Posukh, O.V., Heaton, S., Willcockson, M.A., Pindyurin, A.V., Zhimulev, I.F., Skoultchi, A.I.,  
731 Fyodorov, D.V., 2017. Regulatory functions and chromatin loading dynamics of linker  
732 histone H1 during endoreplication in *Drosophila*. *Genes Dev.* 31, 603–616.  
733 doi:10.1101/gad.295717.116

734

735 Andreyeva, E.N., Kolesnikova, T.D., Belyaeva, E.S., Glaser, R.L., Zhimulev, I.F., 2008. Local DNA  
736 underreplication correlates with accumulation of phosphorylated H2Av in the *Drosophila*

- 737 melanogaster polytene chromosomes. *Chromosome Res.* 16, 851–862.  
738 doi:10.1007/s10577-008-1244-4  
739
- 740 Barolo, S., Carver, L.A., Posakony, J.W., 2000. GFP and beta-galactosidase transformation  
741 vectors for promoter/enhancer analysis in *Drosophila*. *BioTechniques* 29, 726, 728, 730,  
742 732.  
743
- 744 Bassett, A.R., Tibbit, C., Ponting, C.P., Liu, J.-L., 2013. Highly Efficient Targeted Mutagenesis of  
745 *Drosophila* with the CRISPR/Cas9 System. *Cell Reports* 1–9.  
746 doi:10.1016/j.celrep.2013.06.020  
747
- 748 Beadle, G.W., Ephrussi, B., 1935. Transplantation in *Drosophila*. *Proc. Natl. Acad. Sci. U.S.A.* 21,  
749 642–646.  
750
- 751 Bell, S.P., Labib, K., 2016. Chromosome Duplication in *Saccharomyces cerevisiae*. *Genetics* 203,  
752 1027–1067. doi:10.1534/genetics.115.186452  
753
- 754 Belyaeva, E.S., Goncharov, F.P., Demakova, O.V., Kolesnikova, T.D., Boldyreva, L.V., Semeshin,  
755 V.F., Zhimulev, I.F., 2012. Late replication domains in polytene and non-polytene cells of  
756 *Drosophila melanogaster*. *PLoS ONE* 7, e30035. doi:10.1371/journal.pone.0030035  
757
- 758 Blumenthal, A.B., Kriegstein, H.J., Hogness, D.S., 1974. The Units of DNA Replication in  
759 *Drosophila melanogaster* Chromosomes. *Cold Spring Harb. Symp. Quant. Biol.* 38, 205–223.  
760 doi:10.1101/SQB.1974.038.01.024  
761
- 762 Calvi, B.R., Lilly, M.A., Spradling, A.C., 1998. Cell cycle control of chorion gene amplification.  
763 *Genes Dev.* 12, 734–744.  
764
- 765 Cayrou, C., Coulombe, P., Vigneron, A., Stanojic, S., Ganier, O., Peiffer, I., Rivals, E., Puy, A.,  
766 Laurent-Chabalier, S., Desprat, R., Méchali, M., 2011. Genome-scale analysis of metazoan  
767 replication origins reveals their organization in specific but flexible sites defined by  
768 conserved features. *Genome Res.* 21, 1438–1449. doi:10.1101/gr.121830.111  
769
- 770 Chapman, J.R., Barral, P., Vannier, J.B., Borel, V., Steger, M., 2013. RIF1 Is Essential for 53BP1-  
771 Dependent Nonhomologous End Joining and Suppression of DNA Double-Strand Break  
772 Resection. *Molecular Cell.* 49, 858-871  
773
- 774 Claycomb, J.M., Macalpine, D.M., Evans, J.G., Bell, S.P., Orr-Weaver, T.L., 2002. Visualization of  
775 replication initiation and elongation in *Drosophila*. *J. Cell Biol.* 159, 225–236.  
776 doi:10.1083/jcb.200207046  
777
- 778 Claycomb, J.M., Orr-Weaver, T.L., 2005. Developmental gene amplification: insights into DNA  
779 replication and gene expression. *Trends Genet* 21, 149–162. doi:10.1016/j.tig.2005.01.009  
780

- 781 Cornacchia, D., Dileep, V., Quivy, J.-P., Foti, R., Tili, F., Mellwig, R.S., Antony, C., Almouzni, G.,  
782 Gilbert, D.M., Buonomo, S.B.C., 2012. Mouse Rif1 is a key regulator of the replication-  
783 timing programme in mammalian cells. *EMBO J.* 31, 3678–3690.  
784 doi:10.1038/emboj.2012.214  
785
- 786 Davé, A., Cooley, C., Garg, M., Bianchi, A., 2014. Protein phosphatase 1 recruitment by Rif1  
787 regulates DNA replication origin firing by counteracting DDK activity. *Cell Reports* 7, 53–61.  
788 doi:10.1016/j.celrep.2014.02.019  
789
- 790 Debatisse, M., Le Tallec, B., Letessier, A., Dutrillaux, B., Brison, O., 2012. Common fragile sites:  
791 mechanisms of instability revisited. *Trends Genet* 28, 22–32. doi:10.1016/j.tig.2011.10.003  
792
- 793 Demakova, O.V., Pokholkova, G.V., Kolesnikova, T.D., Demakov, S.A., Andreyeva, E.N., Belyaeva,  
794 E.S., Zhimulev, I.F., 2007. The SU(VAR)3-9/HP1 Complex Differentially Regulates the  
795 Compaction State and Degree of Underreplication of X Chromosome Pericentric  
796 Heterochromatin in *Drosophila melanogaster*. *Genetics* 175, 609–620.  
797 doi:10.1534/genetics.106.062133  
798
- 799 Di Virgilio, M., Callen, E., Yamane, A., Zhang, W., Jankovic, M., Gitlin, A.D., Feldhahn, N., Resch,  
800 W., Oliveira, T.Y., Chait, B.T., Nussenzweig, A., Casellas, R., Robbiani, D.F., Nussenzweig,  
801 M.C., 2013. Rif1 Prevents Resection of DNA Breaks and Promotes Immunoglobulin Class  
802 Switching. *Science* 339, 711–715. doi:10.1126/SCIENCE.122.2.555-566.2002  
803
- 804 Durkin, S.G., Glover, T.W., 2007. Chromosome fragile sites. *Annu. Rev. Genet.* 41, 169–192.  
805 doi:10.1146/annurev.genet.41.042007.165900  
806
- 807 Eaton, M.L., Prinz, J.A., MacAlpine, H.K., Tretyakov, G., Kharchenko, P.V., Macalpine, D.M.,  
808 2011. Chromatin signatures of the *Drosophila* replication program. *Genome Res.* 21, 164–  
809 174. doi:10.1101/gr.116038.110  
810
- 811 Edgar, B.A., Orr-Weaver, T.L., 2001. Endoreplication cell cycles: more for less. *Cell* 105, 297–  
812 306.  
813
- 814 Filion, G.J., van Bommel, J.G., Braunschweig, U., Talhout, W., Kind, J., Ward, L.D., Brugman, W.,  
815 de Castro, I.J., Kerkhoven, R.M., Bussemaker, H.J., van Steensel, B., 2010. Systematic  
816 protein location mapping reveals five principal chromatin types in *Drosophila* cells. *Cell* 143,  
817 212–224. doi:10.1016/j.cell.2010.09.009  
818
- 819 Foti, R., Gnan, S., Cornacchia, D., Dileep, V., Bulut-Karslioglu, A., Diehl, S., Bunes, A., Klein, F.A.,  
820 Huber, W., Johnstone, E., Loos, R., Bertone, P., Gilbert, D.M., Manke, T., Jenuwein, T.,  
821 Buonomo, S.C.B., 2015. Nuclear Architecture Organized by Rif1 Underpins the Replication-  
822 Timing Program. *Molecular Cell*. doi:10.1016/j.molcel.2015.12.001  
823
- 824 Gilbert, D.M., 2002. Replication timing and transcriptional control: beyond cause and effect.

- 825 Curr. Opin. Cell Biol. 14, 377–383.  
826
- 827 Gratz, S.J., Cummings, A.M., Nguyen, J.N., Hamm, D.C., Donohue, L.K., Harrison, M.M.,  
828 Wildonger, J., O'Connor-Giles, K.M., 2013. Genome Engineering of Drosophila with the  
829 CRISPR RNA-Guided Cas9 Nuclease. *Genetics*. doi:10.1534/genetics.113.152710  
830
- 831 Gratz, S.J., Rubinstein, C.D., Harrison, M.M., Wildonger, J., O'Connor-Giles, K.M., 2015. CRISPR-  
832 Cas9 Genome Editing in Drosophila. *Curr Protoc Mol Biol* 111, 31.2.1–31.2.20.  
833 doi:10.1002/0471142727.mb3102s111  
834
- 835 Hannibal, R.L., Baker, J.C., 2016. Selective Amplification of the Genome Surrounding Key  
836 Placental Genes in Trophoblast Giant Cells. *Current Biology* 1–18.  
837 doi:10.1016/j.cub.2015.11.060  
838
- 839 Hannibal, R.L., Chuong, E.B., Rivera-Mulia, J.C., Gilbert, D.M., Valouev, A., Baker, J.C., 2014.  
840 Copy Number Variation Is a Fundamental Aspect of the Placental Genome. *PLoS Genet.* 10,  
841 e1004290. doi:10.1371/journal.pgen.1004290  
842
- 843 Hardy, C.F., Sussel, L., Shore, D., 1992. A RAP1-interacting protein involved in transcriptional  
844 silencing and telomere length regulation. *Genes & Dev* 6, 801–814.  
845 doi:10.1101/gad.6.5.801  
846
- 847 Hayano, M., Kanoh, Y., Matsumoto, S., Renard-Guillet, C., Shirahige, K., Masai, H., 2012. Rif1 is a  
848 global regulator of timing of replication origin firing in fission yeast. *Genes & Dev* 26, 137–  
849 150. doi:10.1101/gad.178491.111  
850
- 851 Hiraga, S.-I., Alvino, G.M., Chang, F., Lian, H.-Y., Sridhar, A., Kubota, T., Brewer, B.J., Weinreich,  
852 M., Raghuraman, M.K., Donaldson, A.D., 2014. Rif1 controls DNA replication by directing  
853 Protein Phosphatase 1 to reverse Cdc7-mediated phosphorylation of the MCM complex.  
854 *Genes Dev.* 28, 372–383. doi:10.1101/gad.231258.113  
855
- 856 Hiraga, S.-I., Ly, T., Garzón, J., Hořejší, Z., Ohkubo, Y.N., Endo, A., Obuse, C., Boulton, S.J.,  
857 Lamond, A.I., Donaldson, A.D., 2017. Human RIF1 and protein phosphatase 1 stimulate DNA  
858 replication origin licensing but suppress origin activation. *EMBO Rep.* 18, 403–419.  
859 doi:10.15252/embr.201641983  
860
- 861 Hua, B.L., Orr-Weaver, T.L., 2017. DNA Replication Control During Drosophila Development:  
862 Insights into the Onset of S Phase, Replication Initiation, and Fork Progression. *Genetics*  
863 207, 29–47. doi:10.1534/genetics.115.186627  
864
- 865 Jackson, A.P., Laskey, R.A., Coleman, N., 2014. Replication proteins and human disease. *Cold*  
866 *Spring Harbor Perspectives in Biology* 6. doi:10.1101/cshperspect.a013060  
867
- 868 Kolesnikova, T.D., Makunin, I.V., Volkova, E.I., Pirrotta, V., Belyaeva, E.S., Zhimulev, I.F., 2005.

- 869 Functional dissection of the Suppressor of UnderReplication protein of *Drosophila*  
870 *melanogaster*: identification of domains influencing chromosome binding and DNA  
871 replication. *Genetica* 124, 187–200.  
872
- 873 Kolesnikova, T.D., Posukh, O.V., Andreyeva, E.N., Bebyakina, D.S., Ivankin, A.V., Zhimulev, I.F.,  
874 2013. *Drosophila* SUUR protein associates with PCNA and binds chromatin in a cell cycle-  
875 dependent manner. *Chromosoma* 122, 55–66. doi:10.1007/s00412-012-0390-9  
876
- 877 Letessier, A., Millot, G.A., Koundrioukoff, S., Lachagès, A.-M., Vogt, N., Hansen, R.S., Malfoy, B.,  
878 Brison, O., Debatisse, M., 2011. Cell-type-specific replication initiation programs set fragility  
879 of the FRA3B fragile site. *Nature* 470, 120–123. doi:10.1038/nature09745  
880
- 881 Li, H., Durbin, R., 2009. Fast and accurate short read alignment with Burrows-Wheeler  
882 transform. *Bioinformatics* 25, 1754–1760. doi:10.1093/bioinformatics/btp324  
883
- 884 Lifeng Xu, E.H.B., 2004. Human Rif1 protein binds aberrant telomeres and aligns along anaphase  
885 midzone microtubules. *J. Cell Biol.* 167, 819–830. doi:10.1083/jcb.200408181  
886
- 887 Lilly, M.A., Duronio, R.J., 2005. New insights into cell cycle control from the *Drosophila*  
888 endocycle. *Oncogene* 24, 2765–2775. doi:10.1038/sj.onc.1208610  
889
- 890 MacAlpine, H.K., Gordân, R., Powell, S.K., Hartemink, A.J., Macalpine, D.M., 2010. *Drosophila*  
891 ORC localizes to open chromatin and marks sites of cohesin complex loading. *Genome Res.*  
892 20, 201–211. doi:10.1101/gr.097873.109  
893
- 894 Makunin, I.V., Volkova, E.I., Belyaeva, E.S., Nabirochkina, E.N., Pirrotta, V., Zhimulev, I.F., 2002.  
895 The *Drosophila* suppressor of underreplication protein binds to late-replicating regions of  
896 polytene chromosomes. *Genetics* 160, 1023–1034.  
897
- 898 Matson, J.P., Dumitru, R., Coryell, P., Baxley, R.M., Chen, W., Twaroski, K., Webber, B.R., Tolar,  
899 J., Bielinsky, A.-K., Purvis, J.E., Cook, J.G., 2017. Rapid DNA replication origin licensing  
900 protects stem cell pluripotency. *Elife* 6. doi:10.7554/eLife.30473  
901
- 902 Mattarocci, S., Shyian, M., Lemmens, L., Damay, P., Altintas, D.M., Shi, T., Bartholomew, C.R.,  
903 Thomä, N.H., Hardy, C.F.J., Shore, D., 2014. Rif1 controls DNA replication timing in yeast  
904 through the PP1 phosphatase Glc7. *Cell Reports* 7, 62–69. doi:10.1016/j.celrep.2014.03.010  
905
- 906 Mesner, L.D., Valsakumar, V., Karnani, N., Dutta, A., Hamlin, J.L., Bekiranov, S., 2011. Bubble-  
907 chip analysis of human origin distributions demonstrates on a genomic scale significant  
908 clustering into zones and significant association with transcription. *Genome Res.* 21, 377–  
909 389. doi:10.1101/gr.111328.110  
910
- 911 Miotto, B., Ji, Z., Struhl, K., 2016. Selectivity of ORC binding sites and the relation to replication  
912 timing, fragile sites, and deletions in cancers. *Proc. Natl. Acad. Sci. U.S.A.* 113, E4810–

- 913 E4819. doi:10.1073/pnas.1609060113  
914
- 915 Moore, D.P., Orr-Weaver, T.L., 1998. Chromosome segregation during meiosis: building an  
916 unambivalent bivalent. *Curr Top Dev Biol* 37, 263–299.  
917
- 918 Newman, T.J., Mamun, M.A., Nieduszynski, C.A., Blow, J.J., 2013. Replisome stall events have  
919 shaped the distribution of replication origins in the genomes of yeasts. *Nucleic Acids Res.*  
920 doi:10.1093/nar/gkt728  
921
- 922 Nordman, J., Li, S., Eng, T., Macalpine, D., Orr-Weaver, T.L., 2011. Developmental control of the  
923 DNA replication and transcription programs. *Genome Res.* 21, 175–181.  
924 doi:10.1101/gr.114611.110  
925
- 926 Nordman, J.T., Kozhevnikova, E.N., Verrijzer, C.P., Pindyurin, A.V., Andreyeva, E.N., Shloma,  
927 V.V., Zhimulev, I.F., Orr-Weaver, T.L., 2014. DNA Copy-Number Control through Inhibition  
928 of Replication Fork Progression. *Cell Reports* 9, 841–849. doi:10.1016/j.celrep.2014.10.005  
929
- 930 Nordman, J.T., Orr-Weaver, T.L., 2015. Understanding replication fork progression, stability, and  
931 chromosome fragility by exploiting the Suppressor of Underreplication protein. *Bioessays.*  
932 doi:10.1002/bies.201500021  
933
- 934 Norio, P., Kosiyatrakul, S., Yang, Q., Guan, Z., Brown, N.M., Thomas, S., Riblet, R., Schildkraut,  
935 C.L., 2005. Progressive activation of DNA replication initiation in large domains of the  
936 immunoglobulin heavy chain locus during B cell development. *Mol. Cell* 20, 575–587.  
937 doi:10.1016/j.molcel.2005.10.029  
938
- 939 Peace, J.M., Ter-Zakarian, A., Aparicio, O.M., 2014. Rif1 Regulates Initiation Timing of Late  
940 Replication Origins throughout the *S. cerevisiae* Genome. *PLoS ONE* 9, e98501.  
941 doi:10.1371/journal.pone.0098501  
942
- 943 Pindyurin, A.V., Boldyreva, L.V., Shloma, V.V., Kolesnikova, T.D., Pokholkova, G.V., Andreyeva,  
944 E.N., Kozhevnikova, E.N., Ivanoschuk, I.G., Zarutskaya, E.A., Demakov, S.A., Gorchakov, A.A.,  
945 Belyaeva, E.S., Zhimulev, I.F., 2008. Interaction between the *Drosophila* heterochromatin  
946 proteins SUUR and HP1. *J. Cell. Sci.* 121, 1693–1703. doi:10.1242/jcs.018655  
947
- 948 Pindyurin, A.V., Moorman, C., de Wit, E., Belyakin, S.N., Belyaeva, E.S., Christophides, G.K.,  
949 Kafatos, F.C., van Steensel, B., Zhimulev, I.F., 2007. SUUR joins separate subsets of PcG, HP1  
950 and B-type lamin targets in *Drosophila*. *J. Cell. Sci.* 120, 2344–2351. doi:10.1242/jcs.006007  
951
- 952
- 953 Remus, D., Beall, E.L., Botchan, M.R., 2004. DNA topology, not DNA sequence, is a critical  
954 determinant for *Drosophila* ORC-DNA binding. *EMBO J.* 23, 897–907.  
955 doi:10.1038/sj.emboj.7600077  
956

- 957 Rhind, N., Gilbert, D.M., 2013. DNA replication timing. *Cold Spring Harbor Perspectives in*  
958 *Biology* 5, a010132. doi:10.1101/cshperspect.a010132
- 959
- 960 Rudkin, G.T. 1969. Non replicating DNA in *Drosophila*. *Genetics* 61, 227-238.
- 961
- 962 Shao, Z., Raible, F., Mollaaghababa, R., Guyon, J.R., Wu, C.T., Bender, W., Kingston, R.E., 1999.  
963 Stabilization of chromatin structure by PRC1, a Polycomb complex. *Cell* 98, 37–46.  
964 doi:10.1016/S0092-8674(00)80604-2
- 965
- 966 Sharan, S.K., Thomason, L.C., Kuznetsov, S.G., Court, D.L., 2009. Recombineering: a homologous  
967 recombination-based method of genetic engineering. *Nat Protoc* 4, 206–223.  
968 doi:10.1038/nprot.2008.227
- 969
- 970 Sher, N., Bell, G.W., Li, S., Nordman, J., Eng, T., Eaton, M.L., Macalpine, D.M., Orr-Weaver, T.L.,  
971 2012. Developmental control of gene copy number by repression of replication initiation  
972 and fork progression. *Genome Res.* 22, 64–75. doi:10.1101/gr.126003.111
- 973
- 974 Siddiqui, K., On, K.F., Diffley, J.F.X., 2013. Regulating DNA replication in eukarya. *Cold Spring*  
975 *Harbor Perspectives in Biology* 5. doi:10.1101/cshperspect.a012930
- 976
- 977 Spradling, A., Orr-Weaver, T., 1987. Regulation of DNA replication during *Drosophila*  
978 development. *Annu. Rev. Genet.* 21, 373–403. doi:10.1146/annurev.ge.21.120187.002105
- 979
- 980 Sreesankar, E., Bharathi, V., Mishra, R.K., Mishra, K., 2015. *Drosophila* Rif1 is an essential gene  
981 and controls late developmental events by direct interaction with PP1-87B. *Sci Rep* 5,  
982 10679. doi:10.1038/srep10679
- 983
- 984 Sreesankar, E., Senthilkumar, R., Bharathi, V., Mishra, R.K., Mishra, K., 2012. Functional  
985 diversification of yeast telomere associated protein, Rif1, in higher eukaryotes. *BMC*  
986 *Genomics* 13, 255. doi:10.1186/1471-2164-13-255
- 987
- 988 Sukackaite, R., Cornacchia, D., Jensen, M.R., Mas, P.J., Blackledge, M., Enverald, E., Duan, G.,  
989 Auchynnikava, T., Köhn, M., Hart, D.J., Buonomo, S.B.C., 2017. Mouse Rif1 is a regulatory  
990 subunit of protein phosphatase 1 (PP1). *Sci Rep* 7, 2119. doi:10.1038/s41598-017-01910-1
- 991
- 992 Swenson, J.M., Colmenares, S.U., Strom, A.R., Costes, S.V., Karpen, G.H., 2016. The composition  
993 and organization of *Drosophila* heterochromatin are heterogeneous and dynamic. *Elife* 5.  
994 doi:10.7554/eLife.16096
- 995
- 996 Yamazaki, S., Ishii, A., Kanoh, Y., Oda, M., Nishito, Y., Masai, H., 2012. Rif1 regulates the  
997 replication timing domains on the human genome. *EMBO J.* 31, 3667–3677.  
998 doi:10.1038/emboj.2012.180
- 999
- 1000 Yarosh, W., Spradling, A.C., 2014. Incomplete replication generates somatic DNA alterations

1001 within *Drosophila* polytene salivary gland cells. *Genes Dev.* 28, 1840–1855.  
1002 doi:10.1101/gad.245811.114

1003  
1004 Zielke, N., Edgar, B.A., DePamphilis, M.L., 2013. Endoreplication. *Cold Spring Harbor*  
1005 *Perspectives in Biology* 5, a012948–a012948. doi:10.1101/cshperspect.a012948

1006  
1007 Zimmermann, M., Lottersberger, F., Buonomo, S.B., Sfeir, A., de Lange, T., 2013. 53BP1  
1008 Regulates DSB Repair Using Rif1 to Control 5' End Resection. *Science* 339, 700–704.  
1009 doi:10.1016/j.jcsb.2005.06.002

1010  
1011

## 1012 **FIGURE LEGENDS**

1013

### 1014 **Figure 1. The SNF2 domain is essential for SUUR function and replication fork localization.**

1015 (A) Schematic representation of the SUUR and SUUR<sup>ΔSNF</sup> proteins. (B) Illumina-based copy  
1016 number profiles (Reads Per Million; RPM) of *chr2L* 1-20,000,000 from larval salivary glands.  
1017 Black bars below each profile represent underreplicated regions identified by CNVnator. (C)  
1018 Average read depth in regions of euchromatic underreplication domains called in wild-type  
1019 salivary glands vs. the full replicated regions of the genome. A Welch Two Sample t-test was  
1020 used to determine *p* values. (D) Quantitative droplet-digital PCR (ddPCR) copy number assay for  
1021 multiple underreplicated regions. Each bar is the average enrichment relative to fully replicated  
1022 control region for three biological replicates. Error bars are the SEM. (E) Localization of SUUR in  
1023 wild-type and *SuUR*<sup>ΔSNF</sup> mutant follicle cells. A single representative stage 13 follicle cell nucleus  
1024 is shown. Arrowheads indicate sites of amplification. Asterisk marks the chromocenter  
1025 (heterochromatin). Scale bars are 2μm. DAPI=blue, SUUR=green, EdU=red.

1026

### 1027 **Figure 2. Rif1 is required for underreplication.**



1028 (A) Schematic representation of the *Rif1* gene and CRISPR-induced *Rif1* mutants. Lightning bolts  
1029 represent the 5' and 3' gRNA positions. (B) Illumina-based copy number profiles of the *chr2L*  
1030 from larval salivary glands. Black bars below each profile represent underreplicated regions  
1031 identified by CNVnator. The wild-type and *SuUR* profiles are the same as in Figure 1b. (C)  
1032 Average read depth in regions of euchromatic underreplication domains called in wild-type  
1033 salivary glands vs. the fully replicated regions of the genome. A Welch Two Sample t-test was  
1034 used to determine  $p$  values. (D) Quantitative droplet-digital PCR (ddPCR) copy number assay for  
1035 multiple underreplicated regions. Each bar is the average enrichment relative to fully replicated  
1036 control region for three biological replicates. Error bars are the SEM.

1037

1038 **Figure 3. *Rif1* regulates replication fork progression.**

1039 (A) Illumina-based copy number profile of sites of follicle cell gene amplification. DNA was  
1040 extracted from wild type and *Rif1* mutant stage 13 egg chambers and compared to DNA  
1041 extracted from 0-2 hr embryos. The resulting graphs are the  $\log_2$ -transformed ratios of egg  
1042 chamber relative to embryonic DNA. Bars below the graphs represent the distance between the  
1043 half-maximum copy number on each side of the replication origin. (B) Fraction of cells that  
1044 display visible amplification foci in each stage of gene amplification. Average of two biological  
1045 replicates in which two egg chambers from each stage were used per biological replicate. 100-  
1046 300 follicle cells were counted per genotype. Error bars are the SEM.

1047

1048 **Figure 4. *Rif1* acts downstream of *SUUR*.**

1049 Localization of replication forks (EdU) and SUUR in a wild-type and *Rif1* mutant follicle cell  
1050 nuclei. A single representative stage 13 follicle cell nucleus is shown. Scale bars are 2 $\mu$ m.  
1051 Arrowheads indicate sites of amplification. Asterisks marks the chromocenter  
1052 (heterochromatin). DAPI=blue, SUUR=green, EdU=red.

1053

1054

1055 **Figure 5. SUUR is necessary to retain Rif1 at replication forks.**

1056 Localization of active replication forks (EdU) and Rif1 in a wild-type and *SuUR* mutant follicle cell  
1057 nuclei. Single representative follicle cell nuclei are shown for each stage. Scale bars are 2 $\mu$ m.  
1058 Arrowheads indicate sites of amplification. Asterisk marks the chromocenter  
1059 (heterochromatin).

1060

1061

1062 **Figure 6. The Rif1/PP1 interaction is necessary to promote underreplication.**

1063 (A) Quantitative droplet-digital PCR (ddPCR) copy number assay for multiple underreplicated  
1064 regions. Each bar is the average enrichment relative to fully replicated control region for three  
1065 biological replicates. Error bars are the SEM. (B) A new model for SUUR-mediated  
1066 underreplication. In this model SUUR serves as a scaffold to recruit a Rif1/PP1 complex to  
1067 replication forks where Rif1/PP1 inhibits replication fork progression through  
1068 dephosphorylation of a component of the replisome. Replication fork image is adapted from  
1069 (Nordman and Orr-Weaver, 2015)

1070

1071 **Supplemental Figure S1 – related to Figure 1. Genome-wide copy number profile of the**  
1072 ***SuUR*<sup>ΔSNF</sup> mutant.**

1073 Illumina-based copy number profiles of all chromosome arms except the fourth for larval  
1074 salivary glands of the indicated genotypes and wild type 0-2h embryos in which DNA is fully  
1075 replicated. Black bars below each profile represent called underreplicated regions.

1076

1077 **Supplemental Figure S2 – related to Figure 2 and Figure 5. Verification of *Rif1* mutants and**  
1078 **validation of anti-Rif1 antibody.**

1079 (A) Western blot analysis of ovary extracts prepared from the indicated genotypes. Serum  
1080 produced in guinea pigs was used at 1:1000 dilution. (B) Immunofluorescence of ovaries using  
1081 affinity purified anti-Rif1 antibody produced in guinea pigs. Exposure times were equal between  
1082 the two genotypes. (C) Embryo hatch rate assay comparing embryos laid by wild-type or  
1083 *Rif1*<sup>1</sup>/*Rif1*<sup>2</sup> mutant mothers. n=300 embryos per genotype. Each data point represents the  
1084 hatch rate of a group of 10 embryos. An unpaired student t-test was used to generate the *p*  
1085 value.

1086

1087 **Supplemental Figure S3 – related to Figure 2. Genome-wide copy number profile of the *Rif1***  
1088 **mutant.**

1089 (A) Illumina-based copy number profiles of all chromosome arms except the fourth for larval  
1090 salivary glands of the indicated genotypes. Black bars below each profile represent called  
1091 underreplicated regions. (B) Box plot represents read depth in 10 kb bins in the pericentric  
1092 chromatin regions for *chr 2L, 2R, 3L* and *3R*. A Welch Two Sample t-test was used to compare

1093 the same regions between *SuUR* and *Rif1* mutants. The same wild-type, *SuUR* and 0-2h embryo  
1094 plots as in Supplemental Figure S1.

1095

1096 **Supplemental Figure S4. *Rif1* mutant salivary gland cells display a pattern of late replication.**

1097 (A) Representative immunofluorescent images of 3<sup>rd</sup> instar salivary glands pulse labelled with  
1098 EdU and stained with anti-HP1 to mark heterochromatin. Wild-type cells fail to incorporate EdU  
1099 into regions of heterochromatin due to underreplication, whereas EdU can be detected in the  
1100 heterochromatic regions of *SuUR* and *Rif1* mutants. DAPI=blue, EdU=green, HP1=red (B)

1101 Quantitation of three biological replicates. Out of the total number of EdU positive cells, the  
1102 fraction incorporating EdU predominantly in the heterochromatic (HP1) regions were  
1103 measured. More than 200 EdU positive cells were scored for each genotype.

1104

1105 **Supplemental Figure S5. *Rif1* mutant endo cycling cells have enlarged chromocenters.**

1106 Representative image of of nurse cell nuclei from stage 10 egg chambers. Egg chambers were  
1107 stained with DAPI. Scale bar is 10  $\mu$ m. Exposure times and scaling are equal in all images.

1108

1109 **Supplemental Figure S6 – related to Figure 6. The *Rif1*<sup>PP1</sup> protein expression is similar to wild  
1110 type *Rif1*.**

1111 (A) Western blot analysis of ovary extracts from *Rif1*<sup>PP1</sup>/*Rif1*<sup>1</sup> and *Rif1*<sup>1</sup>/*+* adults. Serum was  
1112 produced in guinea pigs and used at 1:1000 dilution.

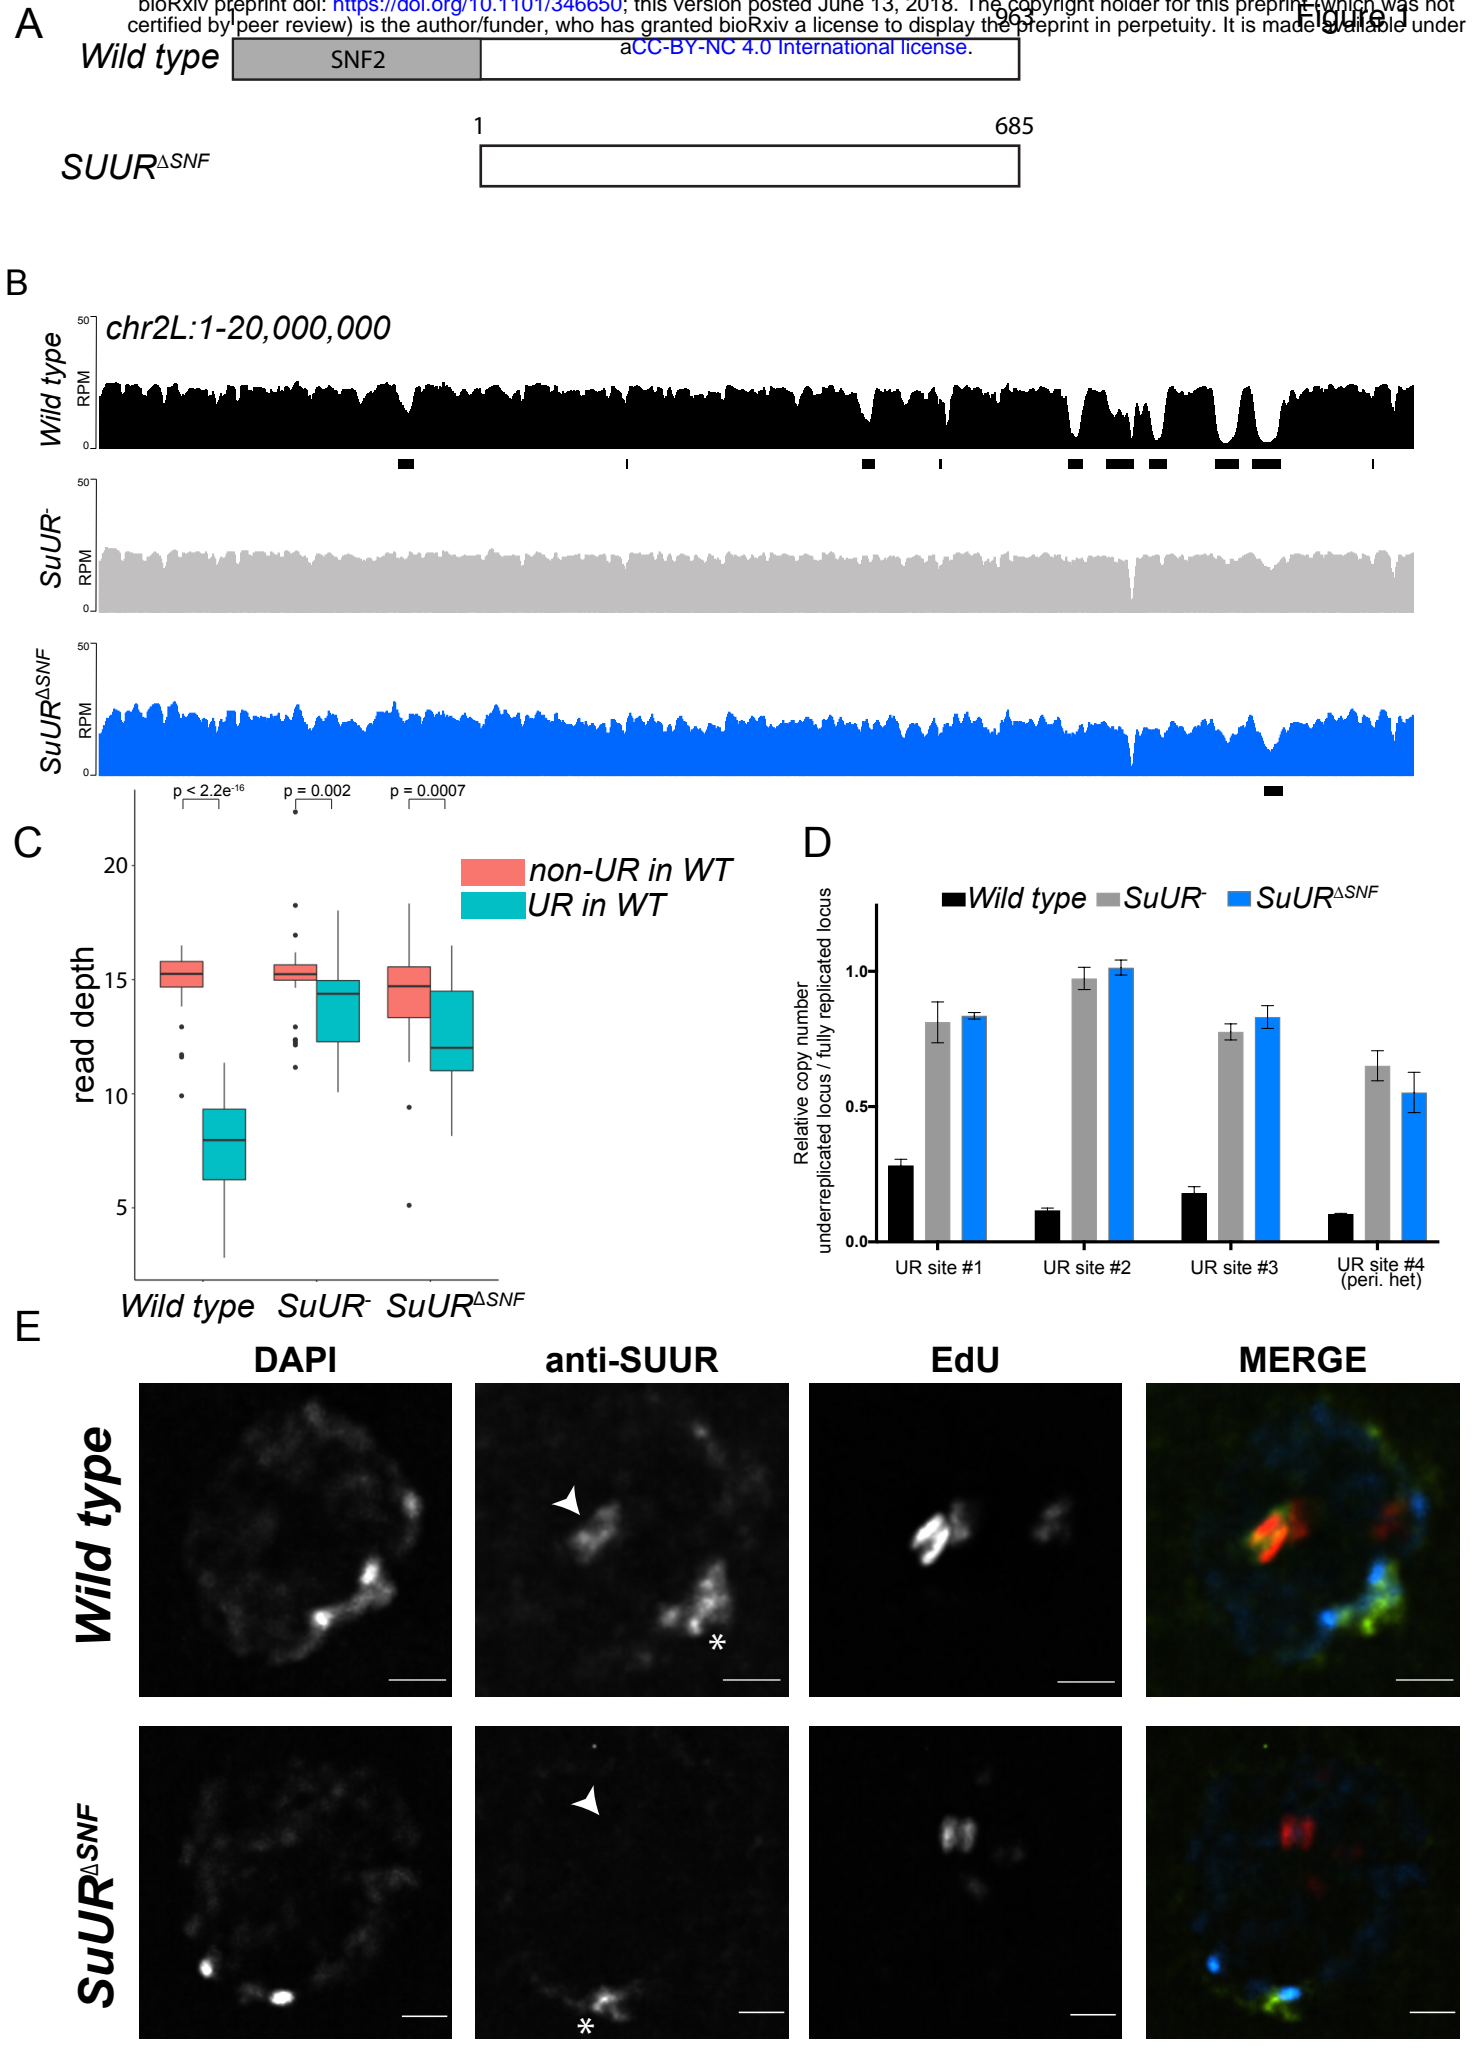

A

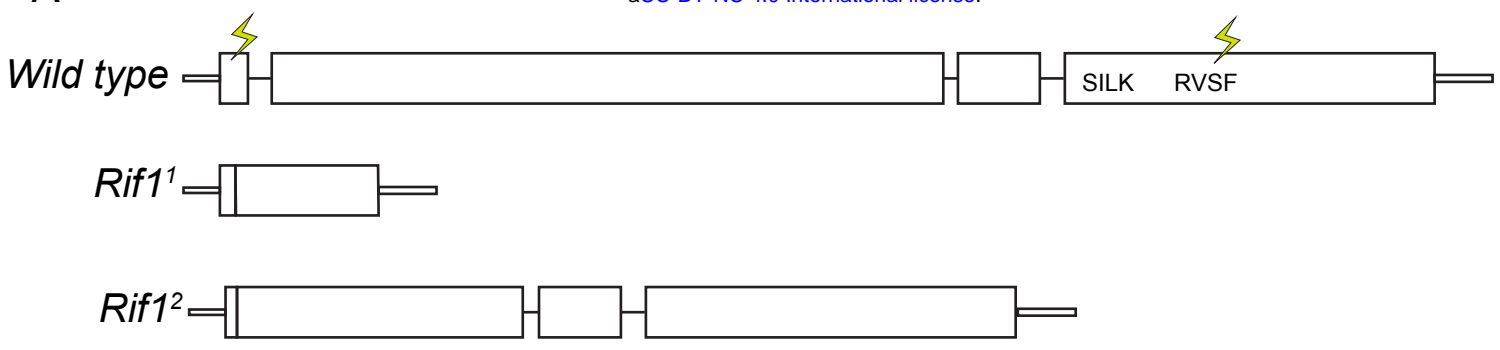

B

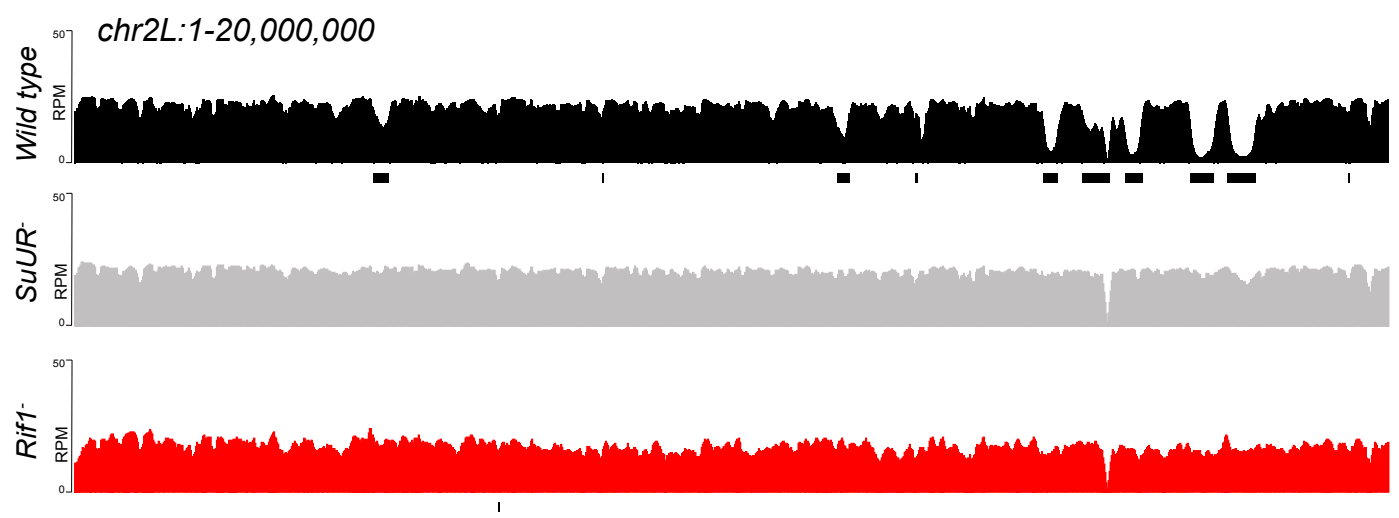

C

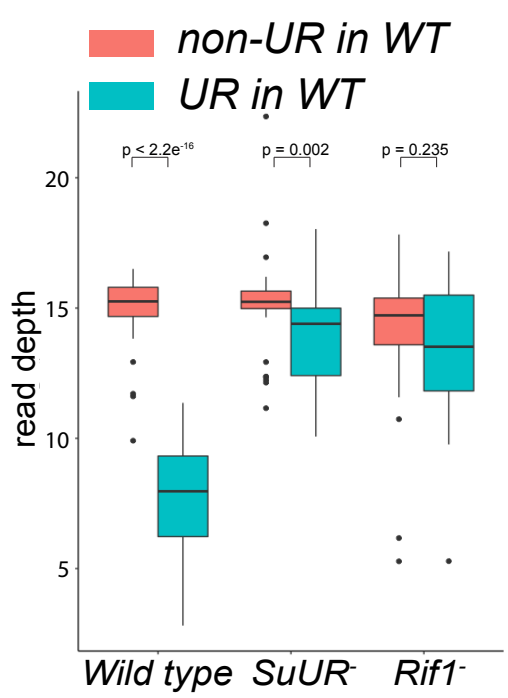

D

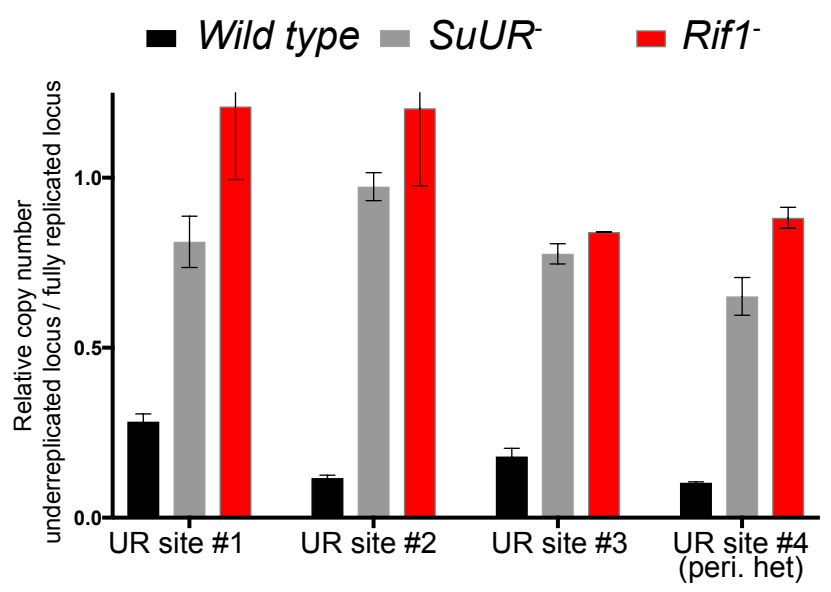

**A**

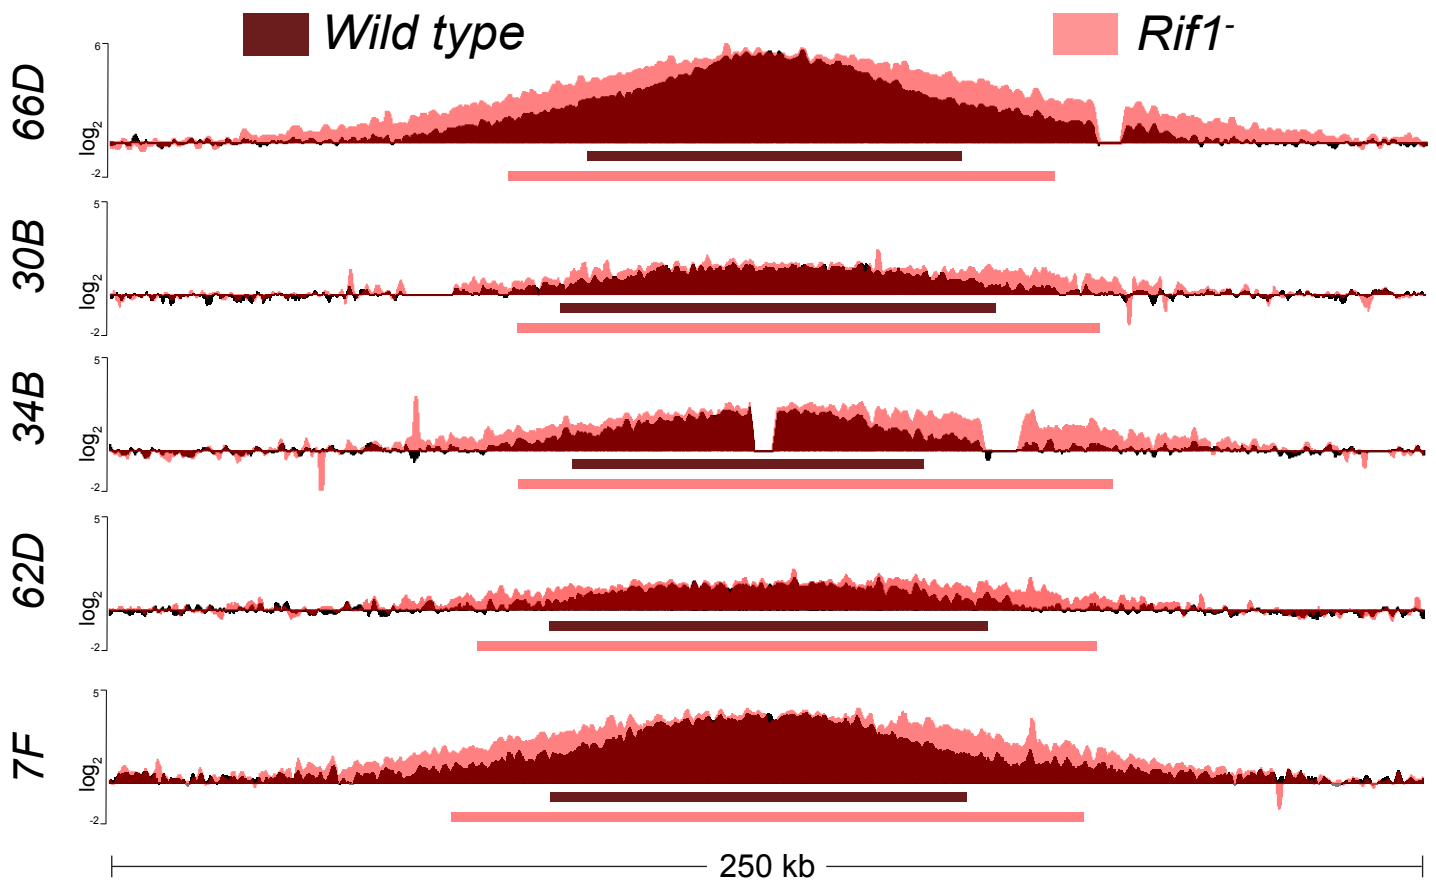

**B**

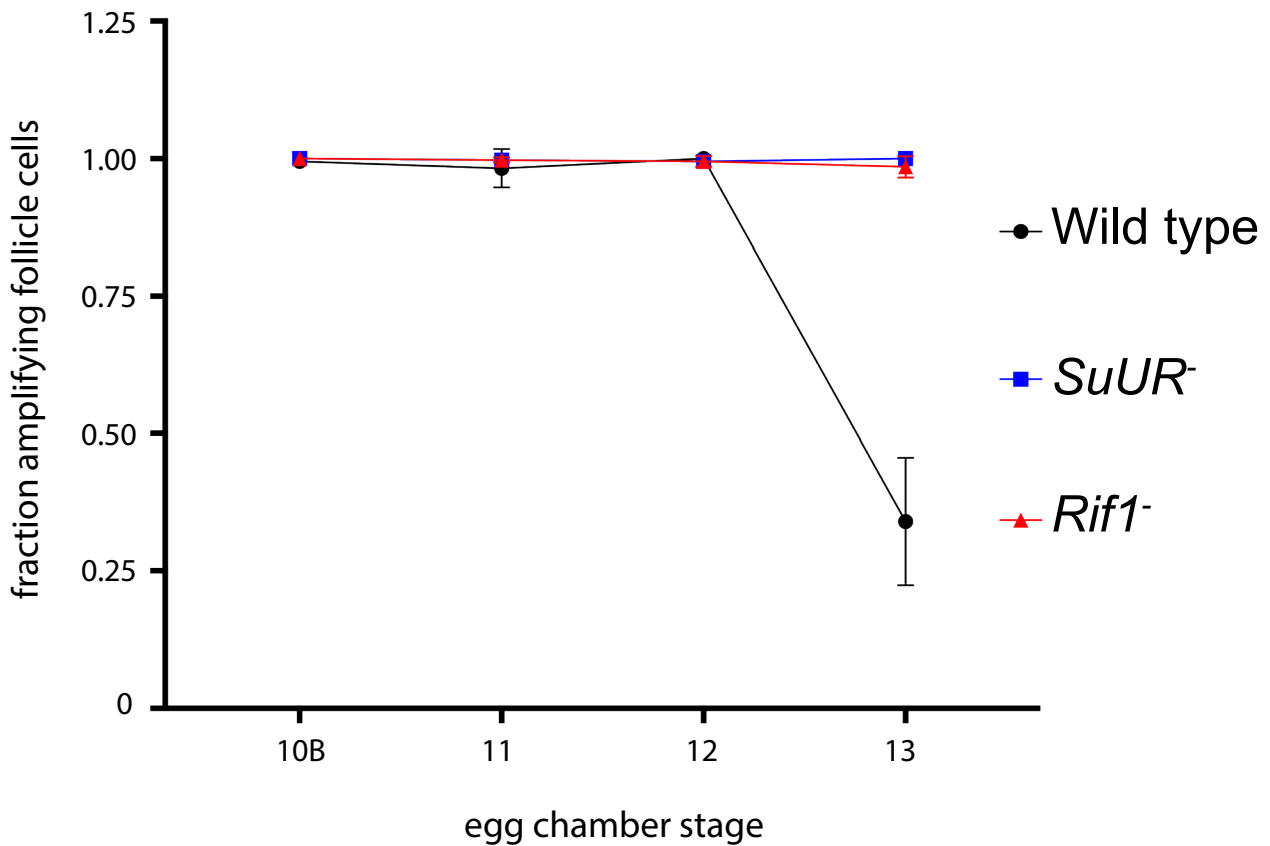

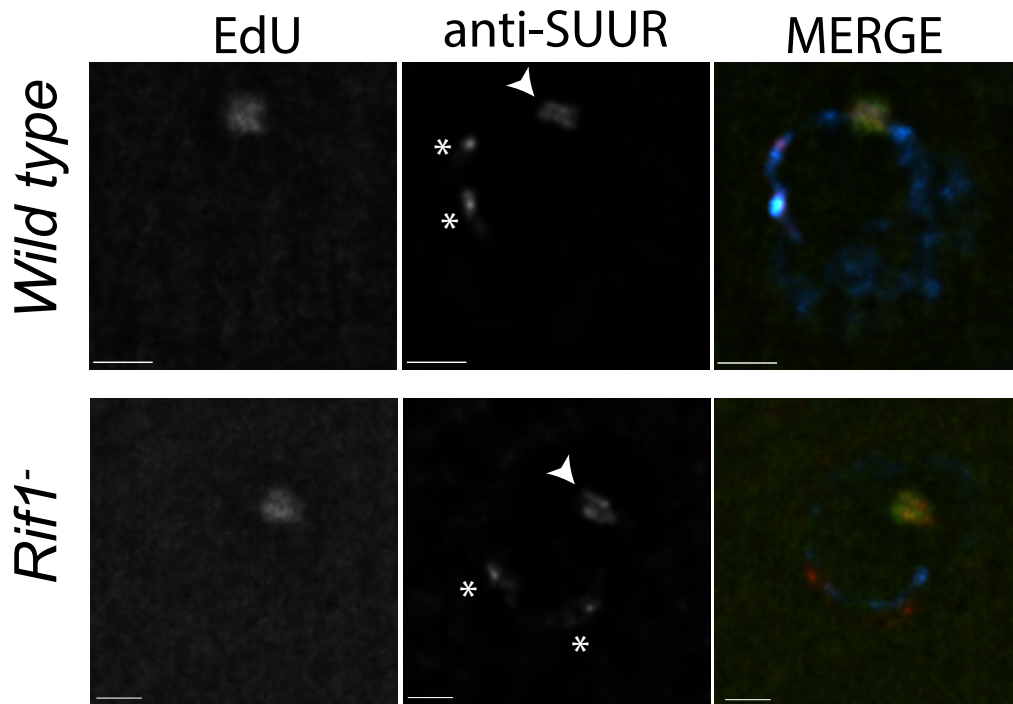



**Figure 6**

*Wild type*

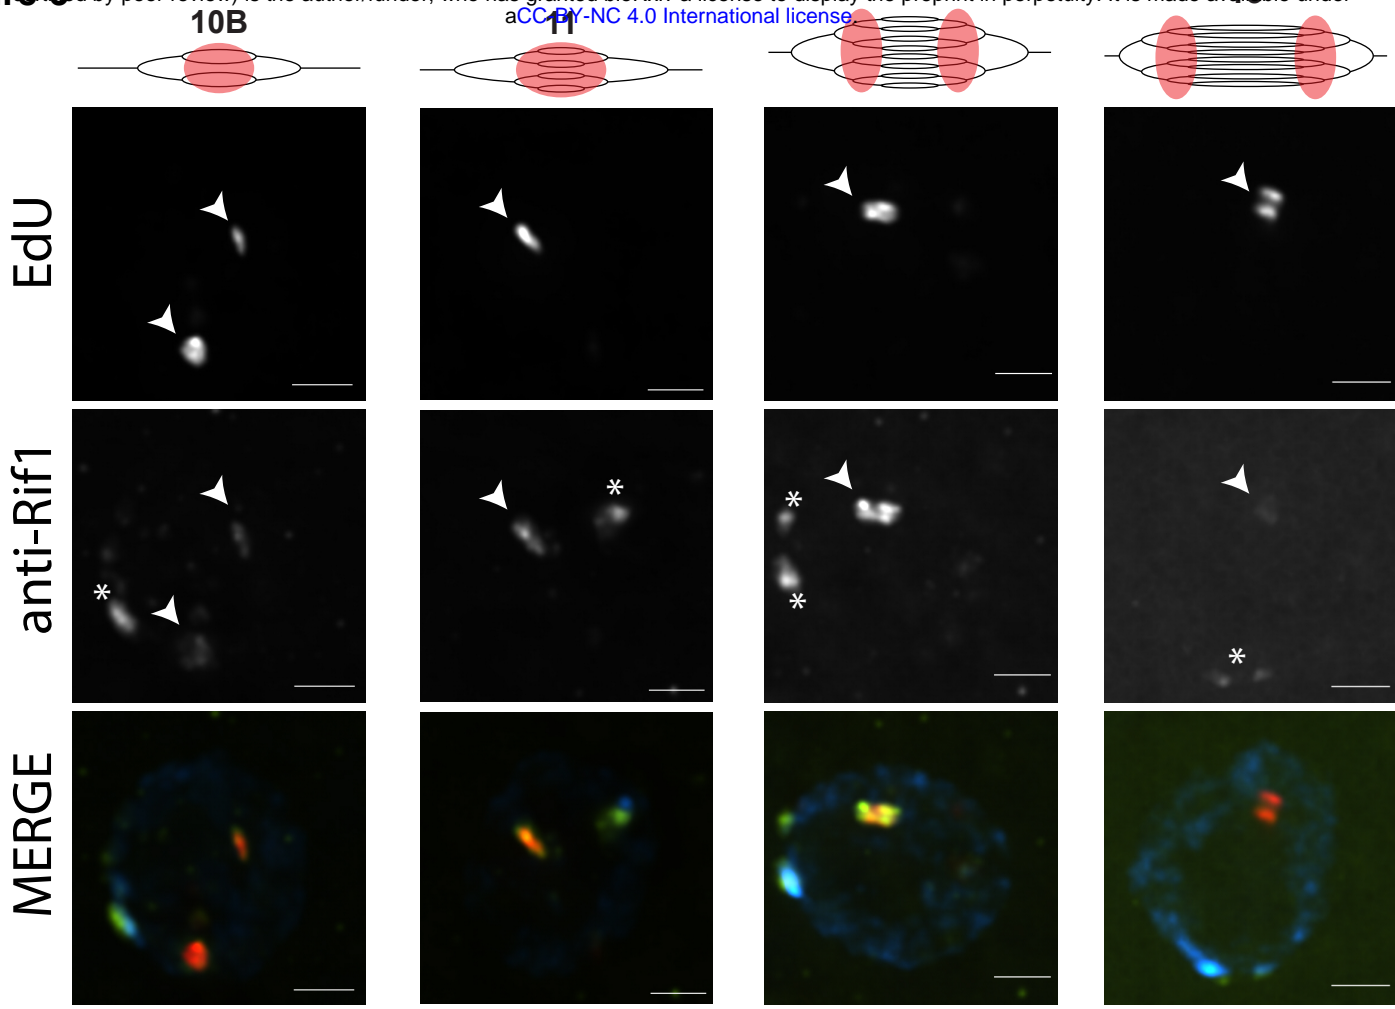

*SuUR-*

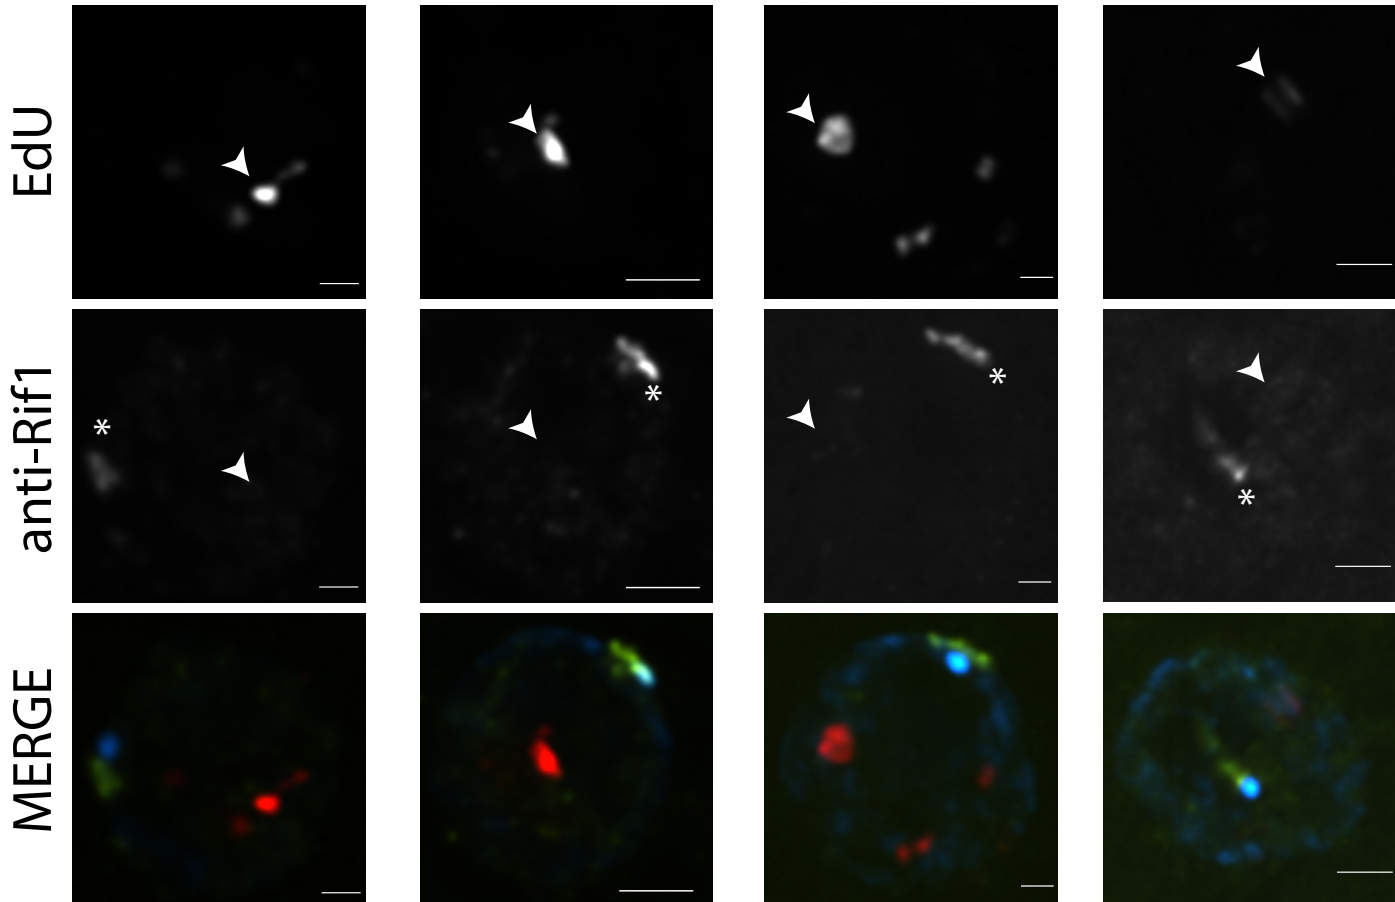

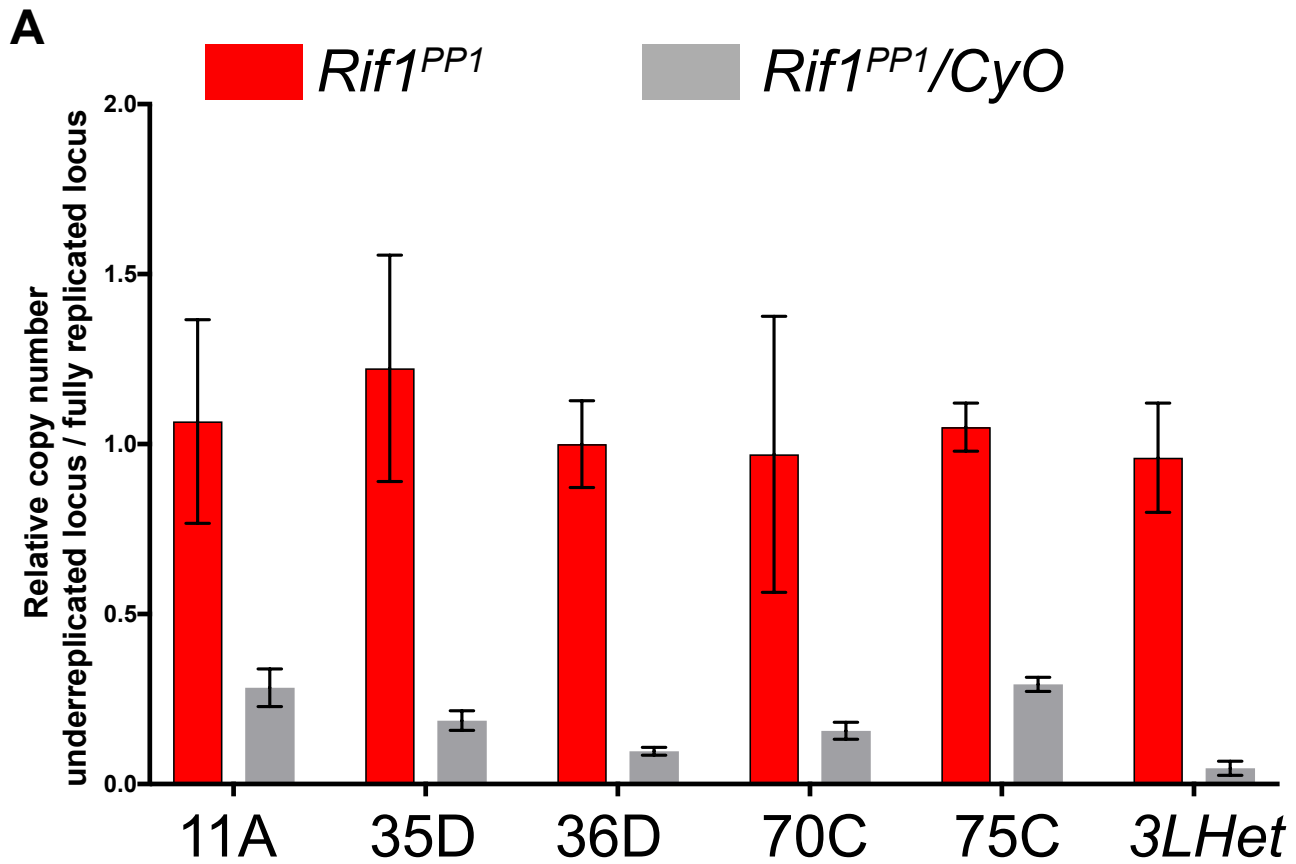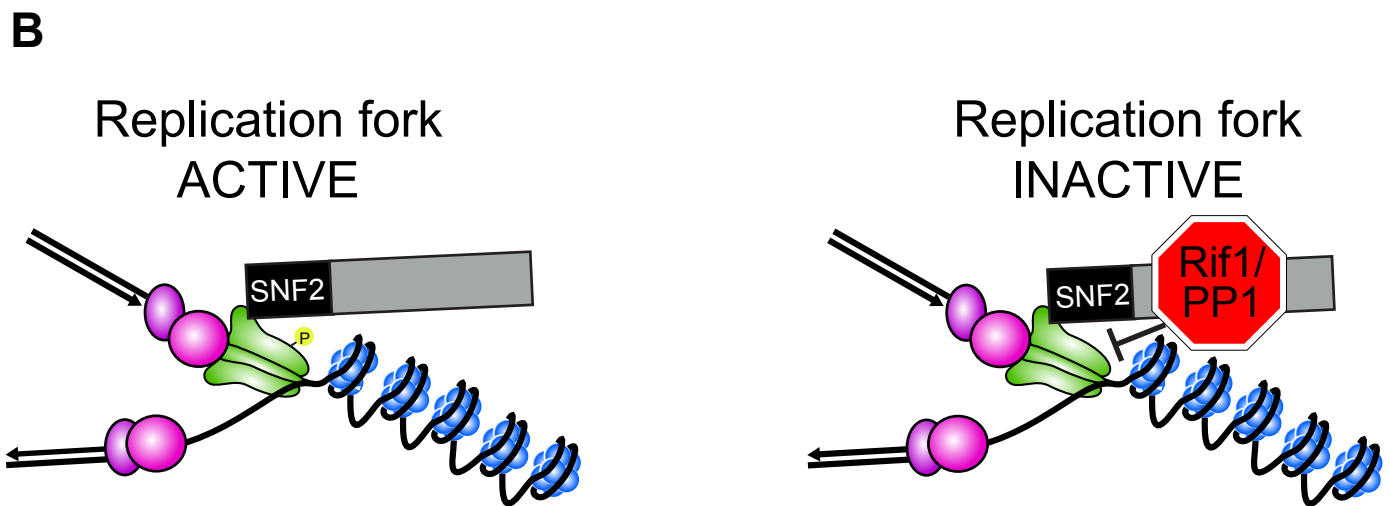

| <b>Table 1</b> | Full length SUUR |          |          | SNF2 domain |          |          | negative control |          |          |
|----------------|------------------|----------|----------|-------------|----------|----------|------------------|----------|----------|
|                | Repl. #1         | Repl. #2 | Repl. #3 | Repl. #1    | Repl. #2 | Repl. #3 | Repl. #1         | Repl. #2 | Repl. #3 |
| SUUR           | 36               | 48       | 26       | 21          | 18       | 10       | 1                | 1        | 2        |
| Rif1(CG30085)  | 29               | 24       | 14       | 1           | 0        | 0        | 0                | 0        | 0        |

| Comparison of Rif1 abundance* |             |
|-------------------------------|-------------|
| Full length vs. SNF2          | p < 0.00010 |
| Full length vs. neg. ctrl     | p < 0.00010 |

\*Fisher's Exact Test

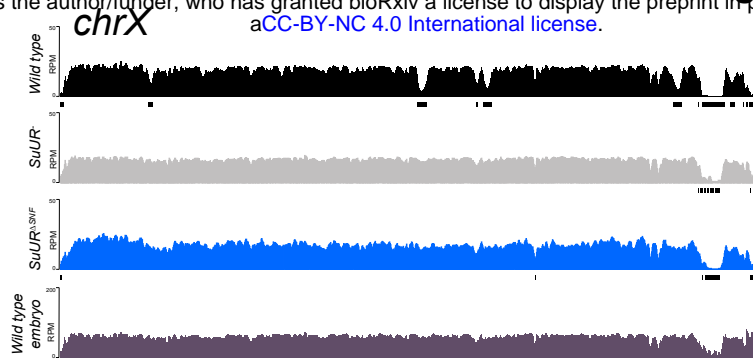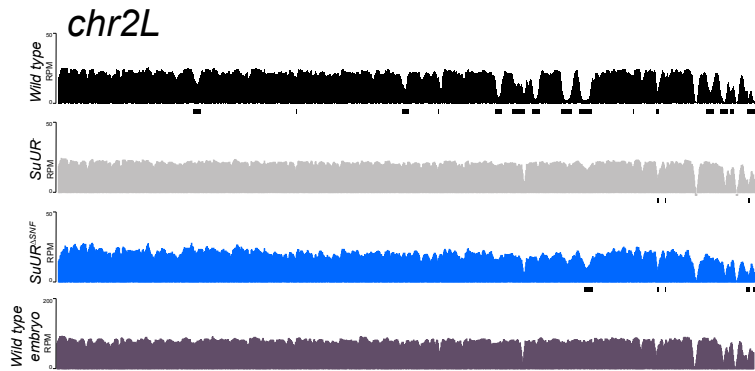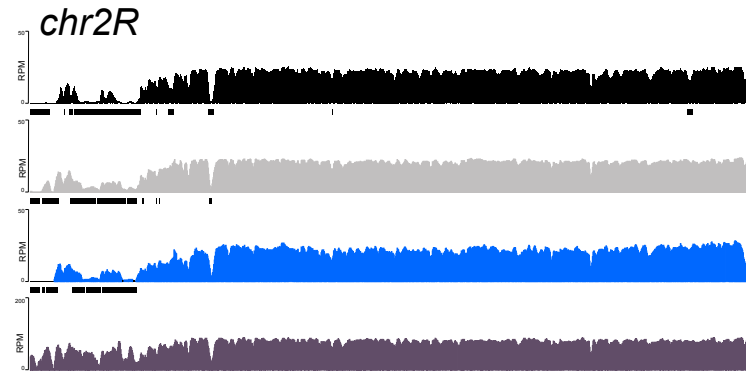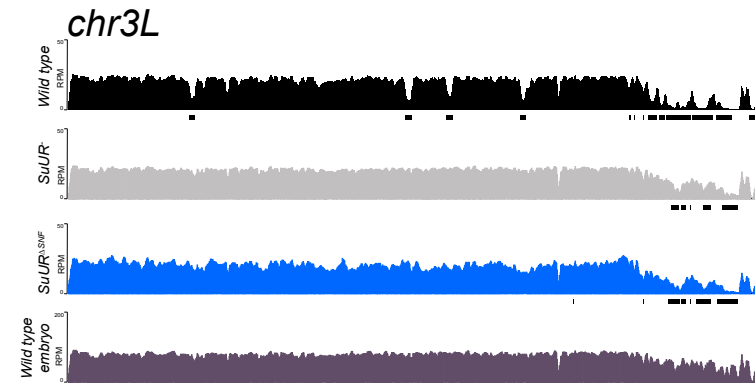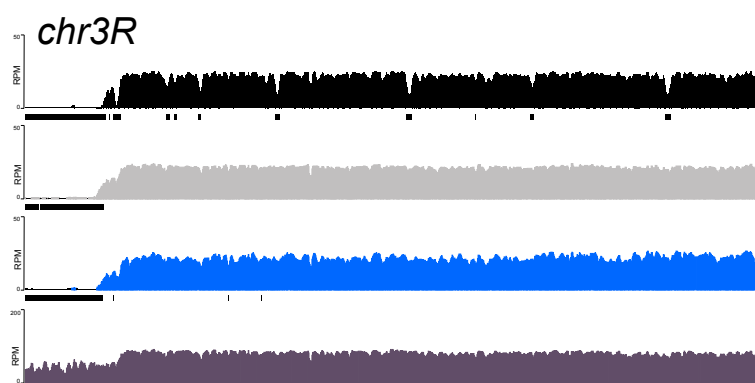

**A**

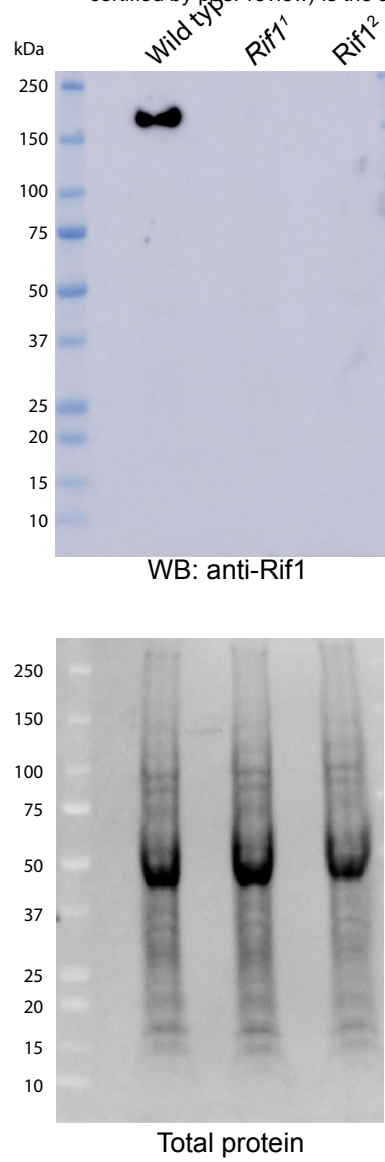

**B**

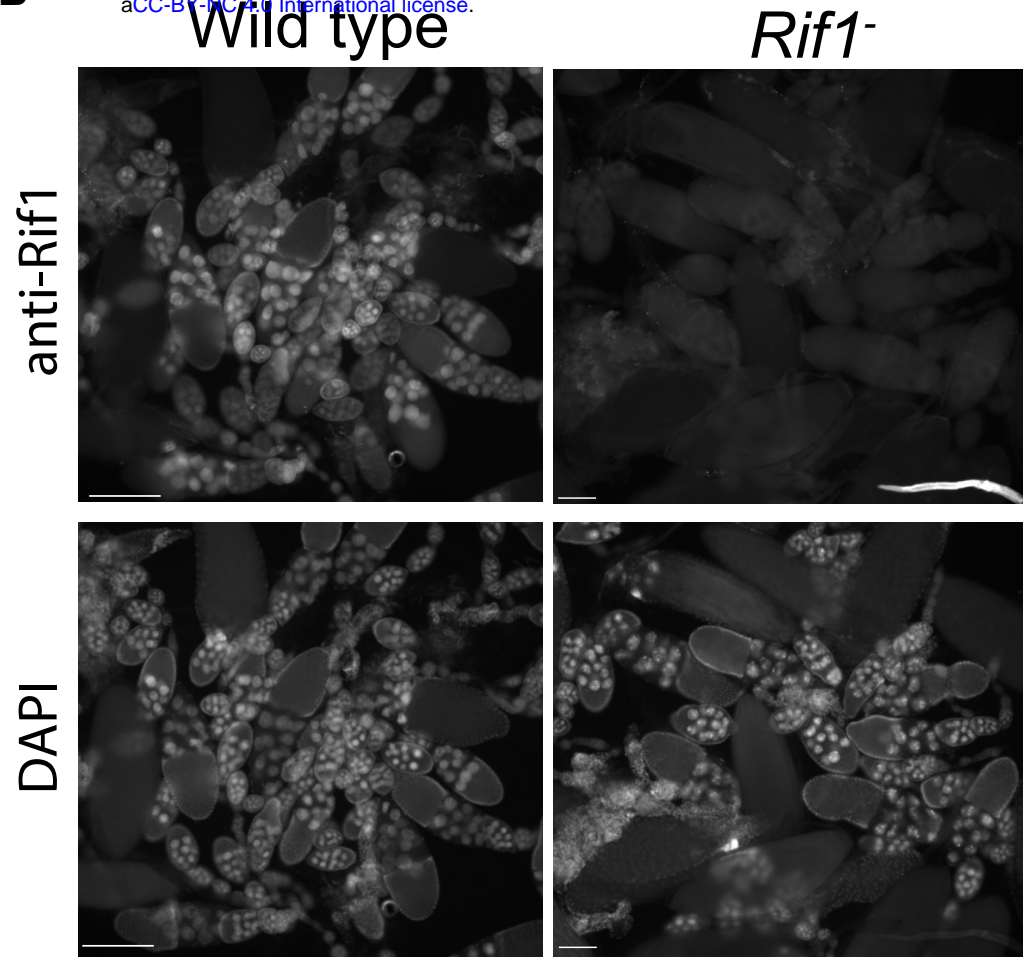

**C**

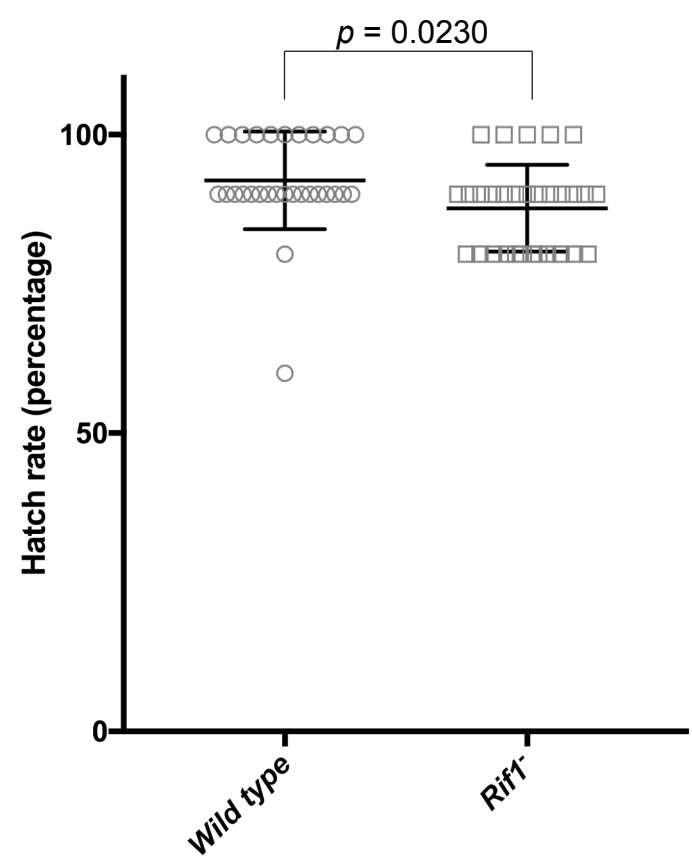

**A**

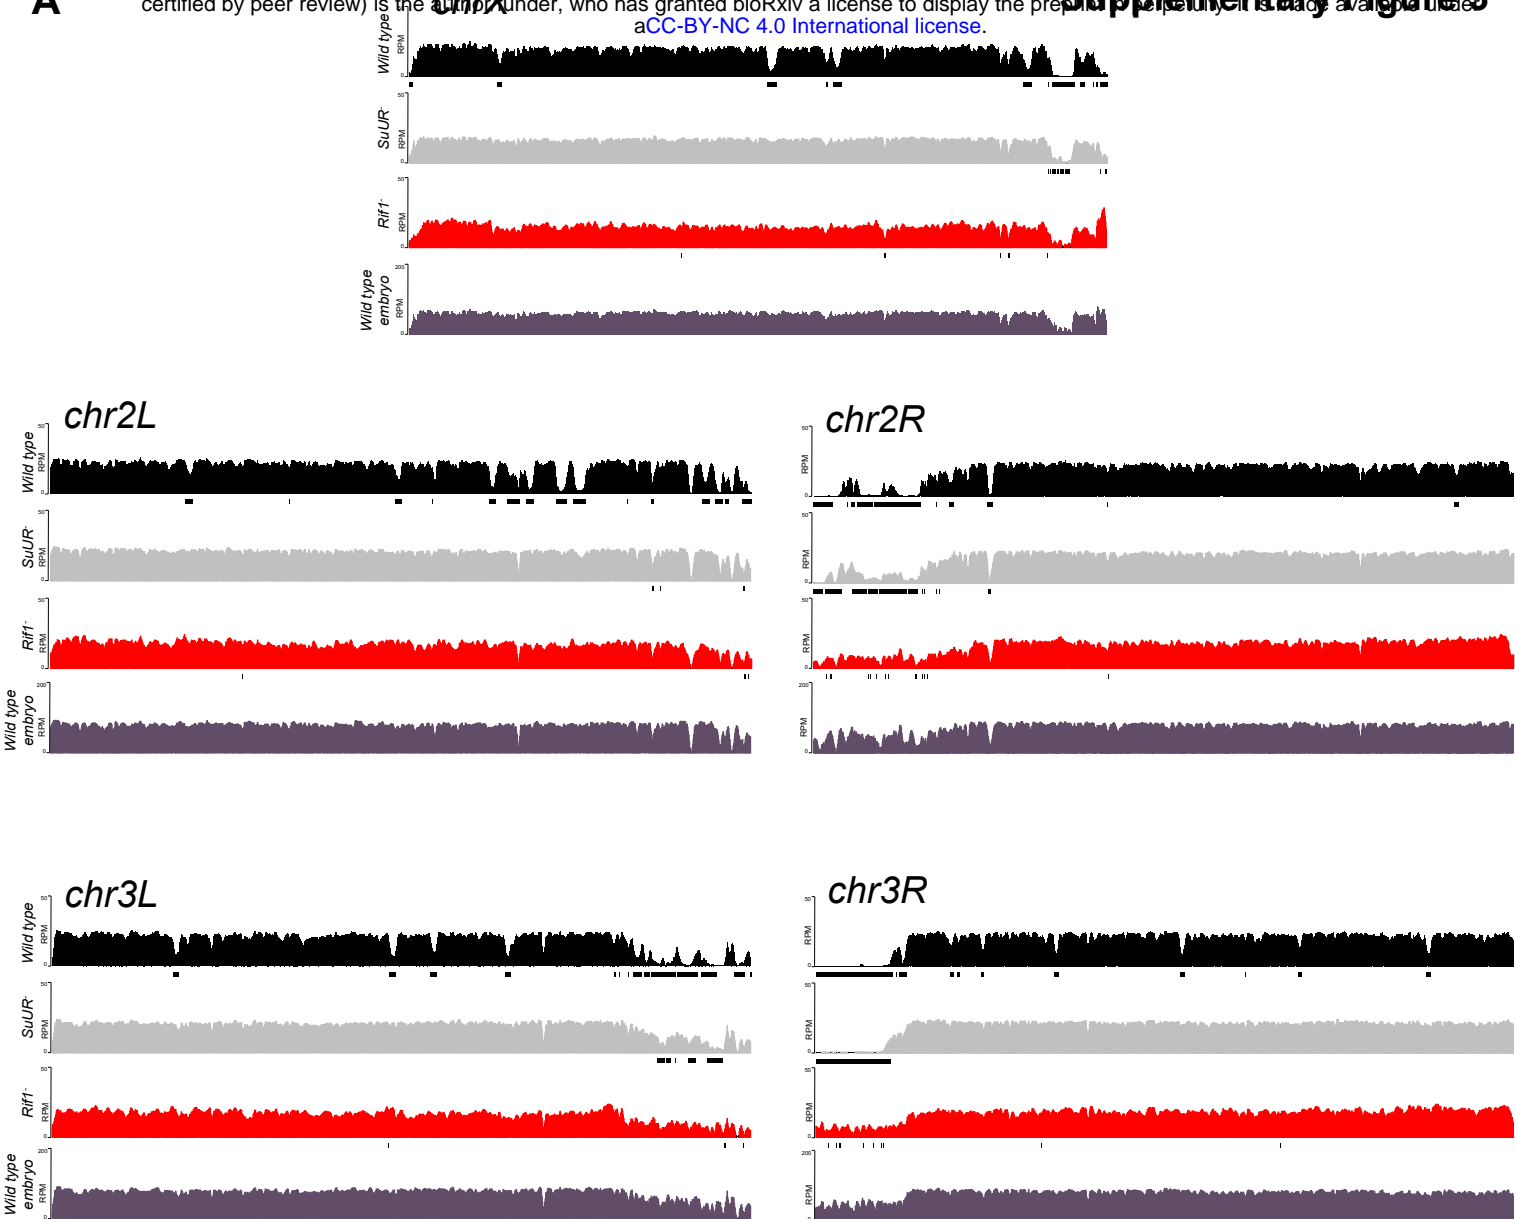

**B**

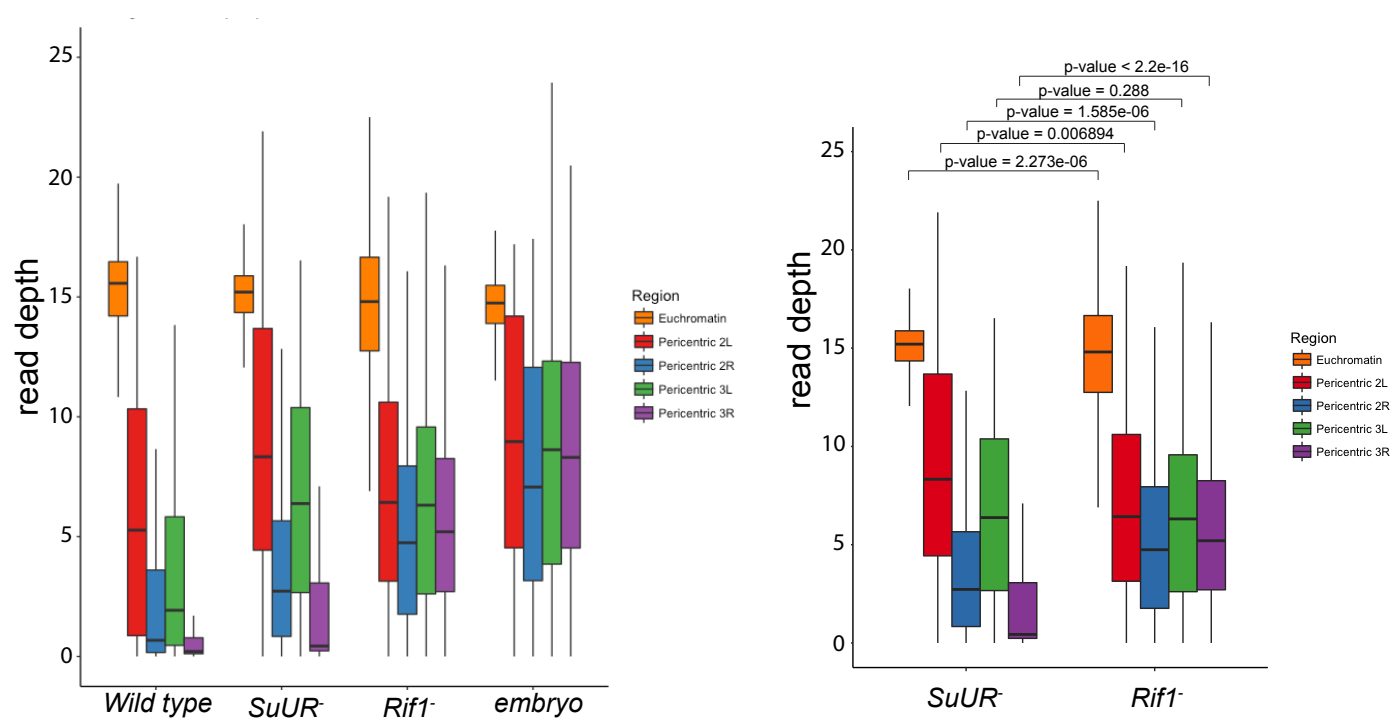



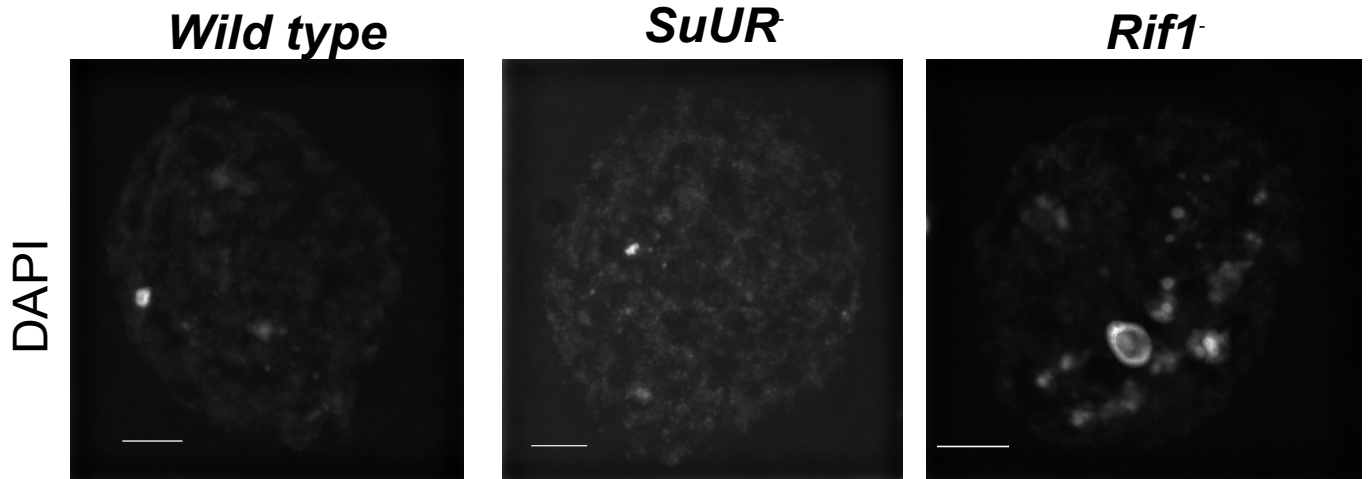



**A**

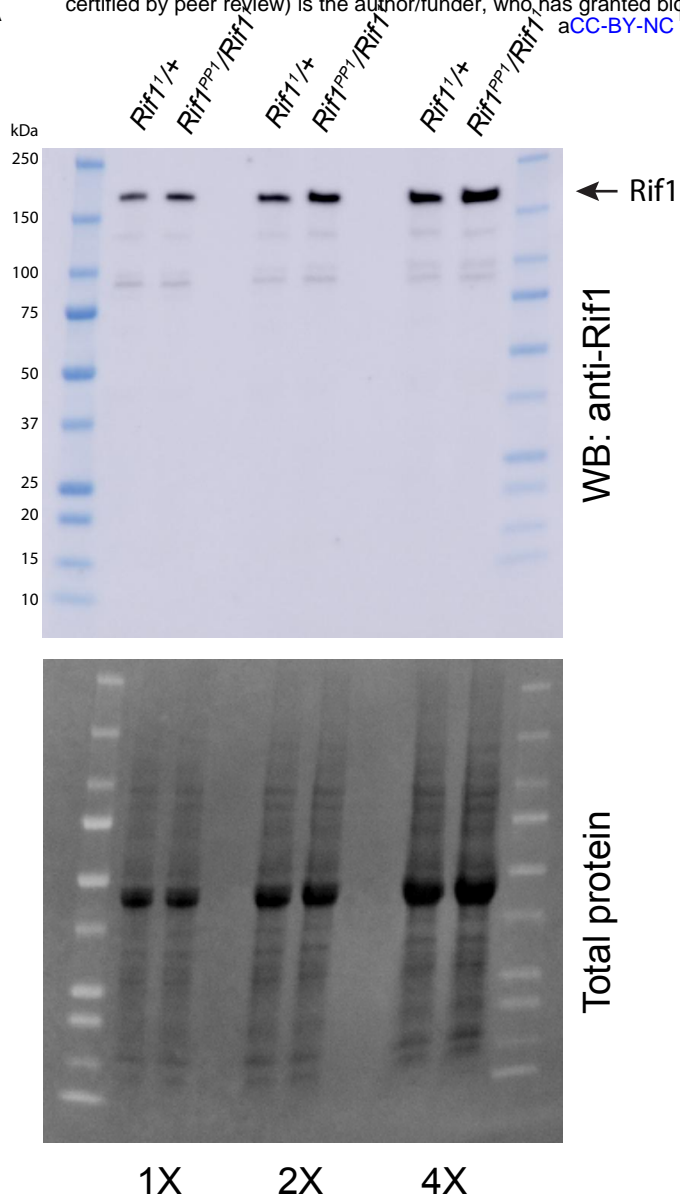

**B**

Supplementary Figure 6

**Supplemental Table 1: Underreplicated regions called by CNVnator**

| chr   | start    | end      | OregonR | SuUR- | SuURΔSNF | Rif1- |
|-------|----------|----------|---------|-------|----------|-------|
| chrX  | 9001     | 52000    | +       |       | +        |       |
| chrX  | 80001    | 108000   | +       |       |          |       |
| chrX  | 2976001  | 3125000  | +       |       |          |       |
| chrX  | 12052001 | 12382000 | +       |       |          |       |
| chrX  | 14062001 | 14101000 | +       |       |          |       |
| chrX  | 14292001 | 14563000 | +       |       |          |       |
| chrX  | 20686001 | 20957000 | +       |       |          |       |
| chrX  | 20962001 | 20998000 | +       |       |          |       |
| chrX  | 21525001 | 21544000 | +       | +     |          | +     |
| chrX  | 21667001 | 21807000 | +       | +     | +        |       |
| chrX  | 21814001 | 21829000 | +       |       |          |       |
| chrX  | 21843001 | 21895000 | +       | +     | +        |       |
| chrX  | 21904001 | 21965000 | +       | +     | +        |       |
| chrX  | 21972001 | 22433000 | +       | +     | +        |       |
| chrX  | 22611001 | 22787000 | +       | +     |          |       |
| chrX  | 23053001 | 23064000 | +       | +     |          |       |
| chrX  | 23175001 | 23205000 | +       |       |          |       |
| chrX  | 23285001 | 23535000 | +       | +     | +        |       |
| chr2L | 4538001  | 4777000  | +       |       |          |       |
| chr2L | 8013001  | 8024000  | +       |       |          |       |
| chr2L | 11587001 | 11777000 | +       |       |          |       |
| chr2L | 12781001 | 12799000 | +       |       |          |       |
| chr2L | 14722001 | 14946000 | +       |       |          |       |
| chr2L | 15306001 | 15721000 | +       |       |          |       |
| chr2L | 15960001 | 16154000 | +       |       |          |       |
| chr2L | 16161001 | 16217000 | +       |       |          |       |
| chr2L | 16948001 | 17199000 | +       |       |          |       |
| chr2L | 17201001 | 17312000 | +       |       |          |       |
| chr2L | 17520001 | 17951000 | +       |       | +        |       |
| chr2L | 19345001 | 19358000 | +       |       |          |       |
| chr2L | 20128001 | 20199000 | +       | +     | +        |       |
| chr2L | 21833001 | 22085000 | +       |       |          |       |
| chr2L | 22284001 | 22522000 | +       |       |          |       |
| chr2L | 22614001 | 22752000 | +       |       |          |       |
| chr2L | 23198001 | 23406000 | +       | +     | +        | +     |
| chr2L | 23415001 | 23513712 | +       |       | +        | +     |
| chr2R | 1        | 699000   | +       | +     | +        | +     |
| chr2R | 1194001  | 1206000  | +       |       |          |       |
| chr2R | 1379001  | 1501000  | +       | +     | +        |       |
| chr2R | 1557001  | 1589000  | +       |       |          |       |

|       |          |          |   |   |   |   |
|-------|----------|----------|---|---|---|---|
| chr2R | 1609001  | 1700000  | + |   |   |   |
| chr2R | 1707001  | 1968000  | + | + | + |   |
| chr2R | 1975001  | 2163000  | + | + | + | + |
| chr2R | 2170001  | 2409000  | + | + | + | + |
| chr2R | 2421001  | 2500000  | + | + | + |   |
| chr2R | 2508001  | 2546000  | + | + | + |   |
| chr2R | 2551001  | 3506000  | + | + |   | + |
| chr2R | 3513001  | 3871000  | + | + | + | + |
| chr2R | 4414001  | 4425000  | + | + |   |   |
| chr2R | 4871001  | 5057000  | + |   |   |   |
| chr2R | 6283001  | 6476000  | + | + |   |   |
| chr2R | 10623001 | 10637000 | + |   |   | + |
| chr2R | 23133001 | 23313000 | + |   |   |   |
| chr3L | 4850001  | 5034000  | + |   |   |   |
| chr3L | 5043001  | 5075000  | + |   |   |   |
| chr3L | 13559001 | 13805000 | + |   |   |   |
| chr3L | 15196001 | 15475000 | + |   |   |   |
| chr3L | 18190001 | 18431000 | + |   |   |   |
| chr3L | 22577001 | 22627000 | + |   |   |   |
| chr3L | 22803001 | 22820000 | + |   |   |   |
| chr3L | 23157001 | 23173000 | + |   | + |   |
| chr3L | 23355001 | 23538000 | + |   |   |   |
| chr3L | 23550001 | 23679000 | + |   |   |   |
| chr3L | 23775001 | 24005000 | + |   |   |   |
| chr3L | 24056001 | 25075000 | + | + | + |   |
| chr3L | 25135001 | 25838000 | + | + | + |   |
| chr3L | 25844001 | 25965000 | + |   | + |   |
| chr3L | 26085001 | 26161000 | + |   | + |   |
| chr3L | 26166001 | 26311000 | + | + |   |   |
| chr3L | 26315001 | 26705000 | + | + | + |   |
| chr3L | 27391001 | 27815000 | + |   |   | + |
| chr3L | 28042001 | 28110227 | + |   |   |   |
| chr3R | 1        | 1257000  | + | + | + | + |
| chr3R | 1266001  | 1655000  | + | + |   |   |
| chr3R | 1664001  | 2569000  | + | + | + |   |
| chr3R | 2572001  | 2824000  | + | + | + | + |
| chr3R | 2831001  | 3034000  | + | + | + | + |
| chr3R | 3040001  | 3129000  | + | + |   | + |
| chr3R | 3136001  | 3533000  | + | + | + |   |
| chr3R | 3674001  | 3692000  | + | + |   |   |
| chr3R | 3827001  | 3842000  | + | + |   |   |
| chr3R | 3890001  | 4175000  | + |   | + |   |

|       |          |          |   |  |   |   |
|-------|----------|----------|---|--|---|---|
| chr3R | 6159001  | 6327000  | + |  |   |   |
| chr3R | 6515001  | 6624000  | + |  |   |   |
| chr3R | 7572001  | 7714000  | + |  | + |   |
| chr3R | 10919001 | 11142000 | + |  | + |   |
| chr3R | 16712001 | 16948000 | + |  |   |   |
| chr3R | 19704001 | 19715000 | + |  |   |   |
| chr3R | 22142001 | 22303000 | + |  |   | + |
| chr3R | 28020001 | 28252000 | + |  |   |   |

**Supplemental Table 2**

**half max position**

| <b>Wild type</b> |              | <b>max (log2)</b> | <b>left arm (bp)</b> | <b>right arm (bp)</b> | <b>half max total (bp)</b> | <b>fold change relative to wild type</b> |
|------------------|--------------|-------------------|----------------------|-----------------------|----------------------------|------------------------------------------|
| 7F               | <i>chrX</i>  | 3.911             | 8439400              | 8518500               | 79100                      | 1                                        |
| 22B*             | <i>chr2L</i> | 1.961             | 1888300              | 1937200               | 48900                      | 1                                        |
| 30B              | <i>chr2L</i> | 1.798             | 9504800              | 9587600               | 82800                      | 1                                        |
| 34B              | <i>chr2L</i> | 2.33              | 13371800             | 13438500              | 66700                      | 1                                        |
| 62D              | <i>chr3L</i> | 1.678             | 2231600              | 2314900               | 83300                      | 1                                        |
| 66D              | <i>chr3L</i> | 5.494             | 8694700              | 8765800               | 71100                      | 1                                        |

**half max position**

| <b>SuUR-</b> |              | <b>max (log2)</b> | <b>left arm (bp)</b> | <b>right arm (bp)</b> | <b>half max total (bp)</b> |             |
|--------------|--------------|-------------------|----------------------|-----------------------|----------------------------|-------------|
| 7F           | <i>chrX</i>  | 3.528             | 8425000              | 8528900               | 103900                     | 1.313527181 |
| 22B*         | <i>chr2L</i> | NA                | NA                   | NA                    | NA                         | NA          |
| 30B          | <i>chr2L</i> | 1.682             | 9506100              | 9607700               | 101600                     | 1.22705314  |
| 34B          | <i>chr2L</i> | 2.355             | 13364800             | 13473500              | 108700                     | 1.629685157 |
| 62D          | <i>chr3L</i> | 1.745             | 2221200              | 2342400               | 121200                     | 1.454981993 |
| 66D          | <i>chr3L</i> | 4.88              | 8685700              | 8778600               | 92900                      | 1.306610408 |

**half max position**

| <b>Rif1-</b> |              | <b>max (log2)</b> | <b>left arm (bp)</b> | <b>right arm (bp)</b> | <b>half max total (bp)</b> |             |
|--------------|--------------|-------------------|----------------------|-----------------------|----------------------------|-------------|
| 7F           | <i>chrX</i>  | 3.824             | 8420700              | 8540700               | 120000                     | 1.517067004 |
| 22B*         | <i>chr2L</i> | NA                | NA                   | NA                    | NA                         | NA          |
| 30B          | <i>chr2L</i> | 1.807             | 9496800              | 9607300               | 110500                     | 1.334541063 |
| 34B          | <i>chr2L</i> | 2.474             | 13361400             | 13474400              | 113000                     | 1.694152924 |
| 62D          | <i>chr3L</i> | 1.719             | 2217900              | 2335500               | 117600                     | 1.411764706 |
| 66D          | <i>chr3L</i> | 5.465             | 8679700              | 8783500               | 103800                     | 1.459915612 |

\*22B is a strain specific amplicon present in Oregon R and not *SuUR* and *Rif1* mutants
